# 1 Cross-tissue immune cell analysis reveals tissue-specific adaptations and clonal architecture 2 across the human body

## 3 Authors:

4 Domínguez Conde C<sup>1,\*</sup>, Gomes T<sup>1,\*</sup>, Jarvis LB<sup>2,\*</sup>, Xu C<sup>1,\*</sup>, Howlett SK<sup>2</sup>, Rainbow DB<sup>2</sup>, Suchanek O<sup>3</sup>,  
5 King HW<sup>4</sup>, Mamanova L<sup>1</sup>, Polanski K<sup>1</sup>, Huang N<sup>1</sup>, Fasouli E<sup>1</sup>, Mahbubani KT<sup>5</sup>, Prete M<sup>1</sup>, Campos L<sup>1,6</sup>,  
6 Mousa HS<sup>2</sup>, Needham EJ<sup>2</sup>, Pritchard S<sup>1</sup>, Li T<sup>1</sup>, Elmentaite R<sup>1</sup>, Park J<sup>1</sup>, Menon DK<sup>7</sup>, Bayraktar OA<sup>1</sup>,  
7 James LK<sup>4</sup>, Meyer KB<sup>1</sup>, Clatworthy MR<sup>1,3</sup>, Saeb-Parsy K<sup>5,#</sup>, Jones JL<sup>2,#</sup>, Teichmann SA<sup>1,8,#</sup>

## 8 Affiliations:

- 9 1. Wellcome Sanger Institute, Cambridge, UK
- 10 2. Department of Clinical Neurosciences, University of Cambridge
- 11 3. Molecular Immunity Unit, Department of Medicine, University of Cambridge, Cambridge, UK
- 12 4. Centre for Immunobiology, Blizard Institute, Queen Mary University of London, London, UK
- 13 5. Department of Surgery, University of Cambridge and NIHR Cambridge Biomedical Research  
14 Centre, Cambridge, UK
- 15 6. West Suffolk Hospital NHS Trust, Bury Saint Edmunds, UK
- 16 7. Department of Anaesthesia, University of Cambridge, Cambridge, UK
- 17 8. Theory of Condensed Matter, Cavendish Laboratory, Department of Physics, University of  
18 Cambridge, Cambridge, UK

19 \*Co-first authors

20 #Corresponding authors

## 21 Abstract

22 Despite their crucial role in health and disease, our knowledge of immune cells within human tissues,  
 23 in contrast to those circulating in the blood, remains limited. Here, we surveyed the immune  
 24 compartment of lymphoid and non-lymphoid tissues of six adult donors by single-cell RNA  
 25 sequencing, including alpha beta T-cell receptor ( $\alpha\beta$  TCR), gamma delta ( $\gamma\delta$ ) TCR and B-cell receptor  
 26 (BCR) variable regions. To aid systematic cell type identification we developed CellTypist, a tool for  
 27 automated and accurate cell type annotation. Using this approach combined with manual curation, we  
 28 determined the tissue distribution of finely phenotyped immune cell types and cell states. This  
 29 revealed tissue-specific features within cell subsets, such as a subtype of activated dendritic cells in  
 30 the airways (expressing *CSF2RA*, *GPR157*, *CRLF2*), *ITGAD*-expressing  $\gamma\delta$  T cells in spleen and liver,  
 31 and *ITGAX*+ splenic memory B cells. Single cell paired chain TCR analysis revealed cell type-specific  
 32 biases in VDJ usage, and BCR analysis revealed characteristic patterns of somatic hypermutation and  
 33 isotype usage in plasma and memory B cell subsets. In summary, our multi-tissue approach lays the  
 34 foundation for identifying highly resolved immune cell types by leveraging a common reference  
 35 dataset, tissue-integrated expression analysis and antigen receptor sequencing.

## 36 Introduction

37 The immune system is a dynamic and integrated network made up of many cell types that are  
 38 distributed across the entire organism and act together to ensure effective host defence. In recent  
 39 years a growing appreciation of immune ontogeny and diversity across tissues has emerged. For  
 40 example, we have gained new insights on how macrophages derived in embryogenesis contribute to  
 41 uniquely adapted adult tissue-resident myeloid cells, such as Langerhans cells in the skin, microglia in  
 42 the brain and Kupffer cells in the liver (1–3). Other populations, such as innate lymphoid cells (ILCs),  
 43 including NK cells, and non-conventional (NKT, MAIT and  $\gamma\delta$ ) T cells, have circulating counterparts but  
 44 are highly enriched at barrier/mucosal sites, where they maintain tissue health by sensing stress,  
 45 promoting tissue repair and antimicrobial defense (4). In addition, long-lived tissue-resident memory T  
 46 cells (TRMs) are able to migrate into peripheral tissues and take up residency after the resolution of  
 47 infection, providing protection from secondary infections via their ability to rapidly regain effector  
 48 functions (reviewed in (5, 6)). Tissue-specific adaptations have been reported for many of these cells,  
 49 such as key tissue-tropic chemokine receptor/integrin profiles and expression of markers that support  
 50 tissue retention (reviewed in (7)). The specialisations of immune cells within tissues serve as a basis  
 51 for their potentially unique roles in local environments, and in the meantime pose a challenge to our  
 52 understanding of their cellular diversity throughout the human body.

53 Despite the important implications tissue immunity has for health and disease, much of this knowledge  
 54 comes from animal studies. Historically, human immune cell analysis has focused on blood, providing  
 55 a biased and incomplete view of our immune system. A number of recent studies analysing human  
 56 tissues by flow cytometry (8–11), and several organ-focused studies utilising single-cell genomics  
 57 (12–16) have improved upon this, but few have analysed immune cells across multiple tissues from  
 58 the same individual and thus controlling for immunological experience. One such study by Szabo et al.  
 59 reported an analysis of T cells in three tissues from two donors (17). However, murine (18) and human  
 60 (19, 20) large-scale multi-tissue scRNA-seq studies investigating tissue-specific features of the  
 61 immune compartment remain rare.

62 Here, we comprehensively profiled immune cell populations isolated from 15 donor-matched tissues  
 63 from six individuals to provide novel insights into tissue-specific immunity. To capture the vast cellular  
 64 diversity for annotating multi-tissue immune cells, we developed CellTypist, an immune cell resource  
 65 compiled from 19 studies under a common framework followed by the use of logistic regression  
 66 classifiers for the accurate prediction of cell type identities. Combining automated annotation and  
 67 in-depth dissection of the cellular heterogeneity within the myeloid and lymphoid compartments, we  
 68 determined the frequency and transcriptional characteristics of immune cells across human tissues.  
 69 Moreover, we inferred the patterns of T and B cell migration across different tissues and their transition  
 70 between cell states based on antigen-receptor sequencing, gaining insights into tissue-dependent  
 71 phenotypic and clonal plasticity.

## 72 Results

### 73 CellTypist: a novel tool for annotating immune cell populations across tissues

74 To systematically assess immune cell type heterogeneity across human tissues, we performed  
 75 single-cell RNA sequencing (scRNA-seq) on 15 different tissues from six deceased organ donors (**Fig.**  
 76 **1A, Supplementary Table 1**). Briefly, cells were isolated using the same protocol across tissues with  
 77 the exception of blood and bone marrow samples (see Methods for details). The tissues studied  
 78 included primary (thymus and bone marrow) and secondary (spleen, thoracic and mesenteric lymph  
 79 nodes) lymphoid organs, mucosal tissues (gut and lung), as well as liver, skeletal muscle and  
 80 omentum. After stringent quality control, we obtained a total of 78,844 hematopoietic cells, with higher  
 81 yields from the lymphoid tissues in all donors (**fig. S1A,B**). Using manual annotation, we identified 14  
 82 major cell populations represented across all donors and tissues from three major immune  
 83 compartments: (i) T cells and ILCs, (ii) B cells and plasma cells and (iii) myeloid cells, including  
 84 monocytes, macrophages and dendritic cells (**Fig. 1B,C, fig. S1C,D**). In addition, we identified four  
 85 small distinct clusters consisting of mast cells, megakaryocytes/platelets (Mgk), plasmacytoid dendritic  
 86 cells (pDCs) and a small population of immune progenitor cells. As expected, progenitors and  
 87 megakaryocyte clusters were primarily found in bone marrow and blood; macrophage and mast cell  
 88 populations were enriched in the lung; lymphocytes mainly came from the lymphoid organs (**fig. S1E**).  
 89 In addition, analyses of the cell type composition within each tissue (**fig. S1F**) revealed that lymph  
 90 nodes and thymus were rich in CD4<sup>+</sup> T cells, while in the liver, spleen, bone marrow and gut CD8<sup>+</sup> T  
 91 cells were predominant. Gut regions were also abundant in plasma cells, and the lung parenchyma  
 92 immune compartment was dominated by monocytes and macrophages.

93 Robust cell type annotation remains a major challenge in single-cell transcriptomics. To address the  
 94 cellular heterogeneity in our cross-tissue study, we developed CellTypist  
 95 (<https://pypi.org/project/celltypist-dev/>), a lightweight classification pipeline for scRNA-seq data based  
 96 on an expandable cell type reference atlas assembled from multiple tissues and studies (**Fig. 1D**,  
 97 **Supplementary Note**). In brief, CellTypist currently includes reference datasets for 20 tissues  
 98 (**Supplementary Note Figure 1A**) with harmonized cell type labels at different  
 99 hierarchically-structured resolutions. This hierarchy is implemented with logistic regression models,  
 100 enabling the prediction of cell identity at different levels of specificity (**Supplementary Note Table 1**),  
 101 a feature of particular importance for determining immune cell identity accurately. Global F1-scores for  
 102 the models ranged between 0.88 and 0.94 (**Fig. 1E**). The representation of a given cell type in the  
 103 training data is a major determinant in how well the model can predict it (**Supplementary Note Fig.**  
 104 **2B and 3C,D**); therefore this will be improved with the incorporation of more datasets.

105 We first applied the high-hierarchy (low-resolution) classifier to our cross-tissue dataset and found high  
 106 consistency when comparing the predicted cell types to our coarse-grained manual annotations (**Fig.**  
 107 **1F**). Due to their functional plasticity, monocytes and macrophages often form a continuum in  
 108 scRNA-seq datasets, which matches the observation of their high cross-classification frequency in our



study. Furthermore, as the training dataset of CellTypist contains hematopoietic tissues with resolved annotations for progenitor populations, the classifier could unravel the manually annotated progenitors into HSC/MPP, pro-myelocytes, erythrocytes and monocytes. In this way, CellTypist can inform and refine manual annotations.

To allow for automated annotation of more specific immune sub-populations, we further applied the low-hierarchy (high-resolution) classifier, which is able to predict cell subtypes including subsets of T cells, B cells, ILCs and dendritic cells (**Fig. 1F**). This classification highlighted a high degree of heterogeneity within the T cell compartment, not only distinguishing between  $\alpha\beta$  and  $\gamma\delta$  T cells, but also unravelling CD4<sup>+</sup> and CD8<sup>+</sup> T cell subtypes and their more detailed effector and functional phenotypes. Specifically, the CD4<sup>+</sup> T cell cluster was classified as helper, regulatory and cytotoxic subsets, and the CD8<sup>+</sup> T cell clusters contained unconventional T cell subpopulations such as MAIT and NKT. Moreover, CellTypist identified a population of germinal center B cells and revealed three distinct subsets of dendritic cells - DC1, DC2 and activated DCs (aDC) (21, 22), again highlighting the granularity CellTypist can achieve.

In summary, we have generated an in-depth map of immune cell populations across human tissues, and developed a framework for automated annotation of immune cell types. CellTypist produced expert-grade annotations on our multi-tissue and multi-lineage dataset, and its performance was better or comparable relative to other label-transferring methods with minimal computational cost (**Supplementary Note Figs 4, 5**). This approach allowed us to further refine the description of multiple cell subtypes such as the progenitors and dendritic cell subtypes at full transcriptomic breadth.

## **Tissue-restricted features of mononuclear phagocytes**

Mononuclear phagocytes, including monocytes, macrophages and dendritic cells, are critical for immune surveillance and tissue homeostasis. Subclustering of the myeloid subsets unveiled further heterogeneity, particularly within the macrophage and monocyte compartments (**Fig. 2A,B, fig. S2A**). We found four major macrophage clusters in the lung: (I) and (II) expressed *GPNMB* and *TREM2*, (III) expressed epithelial markers - potentially due to ambient RNA, doublets or ingestion of epithelial debris -, and (IV) expressed *TNIP3*. *TNIP3* (TNFAIP3-interacting protein 3) binds to A20 (also known as TNF alpha induced protein 3) and inhibits TNF, IL-1 and LPS induced NF- $\kappa$ B activation. Its expression in lung macrophages may be related to underlying pathology as it was primarily detected in a multitrauma donor (A29) with lung contusions (**fig. S2B**). Red pulp macrophages and Kupffer cells expressed *CD5L*, *SCL40A1* and the transcription factor *SPIC(23)*, with *LYVE1* and *ITGA9* distinguishing the Kupffer cells. A small population of macrophages expressed chitin and kinin degrading enzymes *CHIT1* and *CTSK*, respectively. *CHIT1* encodes chitotriosidase, an enzyme secreted by macrophages that degrades chitin, a component of the exoskeletons of mites and other arthropods (24). Macrophages upregulate *CHIT1* during terminal differentiation, and its expression and activity correlates with lung disease (25, 26). Moreover, we identified non-classical monocytes, three

145 subsets of classical monocytes and a small cluster of intermediate monocytes based on the  
146 expression of *CD14* and *FCGR3A*. Notably, several chemokines and their receptors, as well as  
147 adhesion molecules showed specific expression patterns across the myeloid subsets.

148 Within the myeloid compartment, macrophage subsets showed the highest degree of tissue restriction  
149 (**Fig. 2C**). Red pulp macrophages and Kupffer cells were mainly found in spleen and liver as expected,  
150 however, the presence of these clusters in other tissues such as the bone marrow and the mesenteric  
151 lymph node points to the transcriptional similarities between iron recycling macrophages. The  
152 *CHIT1*-expressing macrophages were restricted to the thoracic lymph node (TLN), however, other  
153 datasets have reported these in the lung (27). For dendritic cells, which were more broadly distributed  
154 across tissues, we assessed cross-tissue differential expression. Interestingly, activated dendritic cells  
155 showed upregulation of *AIRE*, *PDLIM4* and *EBI3* in the TLN, and to a lesser extent MLN, while in the  
156 lung they showed *CRLF2* (encoding TLSPR), upregulated chemokines (*CCL22*, *CCL17*), *CSF2RA*  
157 and *GPR157*. TLSPR is involved in the induction of Th2 responses in asthma (28) (**Fig. 2D, E**). These  
158 observations suggest that dendritic cell activation coincides with the acquisition of tissue-specific  
159 markers that differ depending on the local environment.

160 Overall, our analysis of the myeloid compartment revealed shared and tissue-restricted features of  
161 mononuclear phagocytes including rare populations of iron-recycling macrophages in mesenteric  
162 lymph nodes, chitin-degrading macrophages in thoracic lymph nodes and subtypes of activated  
163 dendritic cells.

## 164 **B cell subsets and immunoglobulin repertoires across tissues**

165 B cells constitute the central player in humoral immunity via the production of antibodies that are  
166 tailored to specific body sites. We performed an in-depth analysis of the B cell compartment, revealing  
167 subpopulations across tissues (**Fig. 3A-C**). Within the memory B cells, globally characterized by  
168 expression of the B-cell lineage markers *MS4A1*, *CD19* and *TNFRSF13B*, we found a distinct cluster  
169 (MemB\_ITGAX) positive for *ITGAX*, *TBX21* and *FCRL2*, encoding CD11c, T-bet and the Fc  
170 receptor-like protein 2, respectively. CD11c+T-bet+ B cells, also known as “age-associated B cells” or  
171 ABC cells, have been reported in a range of human conditions (29). Notably, unlike conventional  
172 memory B cells, they show low expression of *CR2* (encoding CD21) and *CD27*. We primarily detect  
173 this population in the spleen, thoracic lymph nodes and bone marrow. Within the naive B cell  
174 compartment, we observed a small cluster, characterized by expression of *ITGA2B* and *SPARC*, that  
175 was only found in blood and spleen and was distinct from the bulk of naive B cells. In addition, we  
176 identified two small populations of germinal center B cells, expressing *AICDA* and *BCL6*, that differed  
177 in their proliferative state (marked by *MKI67*). We did not find any differential expression of dark zone  
178 and light zone marker genes, probably reflecting limited germinal center activity in the adult donors.  
179 These GC populations were present in lymph nodes and different gut regions, presumably

180 representing Peyer's patches. Plasmablasts (Plasma\_prolife) and plasma cells (Plasma\_ITGA8) were  
181 marked by expression of *CD38*, *XBPI* and *SDC1*. The former expressed *MKI67* and were found in  
182 spleen, liver, bone marrow and lymph nodes; the latter expressed *ITGA8*, the adhesion molecule  
183 *CERCAM* and were detected primarily in spleen, caecum, liver, bone marrow and lymph nodes. Lastly,  
184 we also detected a small progenitor population in the bone marrow expressing *IGLL1*, *RAG1* and  
185 *DNTT* and two doublet populations between memory B cells and T cells or macrophages that were not  
186 excluded during automated doublet exclusion.

187 B cells have an additional source of variability due to VDJ recombination, somatic hypermutation and  
188 class-switching, which can influence the number of cell subtypes present. We performed targeted  
189 enrichment and sequencing of BCR transcripts to assess isotypes, hypermutation levels and clonal  
190 architecture of the B cell populations described above. Isotype and subclass usage followed patterns  
191 that related to cellular phenotype (**fig. S3C**). As expected, progenitors and naive B cells mainly  
192 showed IgM and IgD. Interestingly, while memory B cells showed evidence of class switching to IgA1  
193 and IgG1, plasmablasts and plasma cells showed, in addition, a remarkable fraction of switching to  
194 subclasses IgA2 and IgG2. To determine to what extent this isotype subclass bias is correlated with  
195 tissue of origin, we assessed each cell state independently (minimum cell count of 19). Memory B  
196 cells in omentum and mesenteric lymph nodes showed a bias towards IgA1 and terminal ileum, where  
197 Peyer's patches are found, to both IgA1 and IgA2 (**Fig. 3D**). In the plasma cell compartment, we found  
198 an even more striking preference towards IgA2 in several gut regions (caecum, duodenum and  
199 transverse colon) (**Fig. 3E**). Also of note, plasma cells in bone marrow, liver and spleen were  
200 composed of over 20% IgG2 subclass. With more limited numbers, we also report isotype distribution  
201 per tissue for plasmablasts and *ITGAX*<sup>+</sup> memory B cells (**fig. S3D,E**).

202 Somatic hypermutation (SHM) levels were, as expected, lowest in naive B cells and highest in plasma  
203 cells (**fig. S3F**). SHM did not differ significantly between isotypes or subclasses. Nonetheless, there  
204 was a tendency towards higher mutation rates in distal classes IgG2 and IgA2, which are downstream  
205 in the IgH locus and could accumulate more mutations during sequential switching (30) (**Fig. 3F**). We  
206 explored the occurrence of sequential switching events in our data by assessing isotype frequency  
207 among expanded clonotypes (>10 cells), however, the detection of mixed isotype clones was very  
208 infrequent in our data and mostly between IgM and IgD (**fig. S3G**). We then evaluated the distribution  
209 of these expanded clones across tissues and cell types. We found three major groups of clones.  
210 Those present in only 2 tissues, 3-4 tissues or in more than 5 tissues (**Fig. 3G**), similar to previously  
211 reported patterns of B cell clone tissue distribution (31). While those restricted to 2 tissues, typically  
212 spleen, liver and bone marrow, were enriched in plasma cells, those widespread across more than 5  
213 tissues, including lymph nodes, were enriched in memory B cells. Together, these findings suggest  
214 that, as seen in the bone marrow of rhesus macaques (32), tissue-restricted clones could represent a  
215 long-term immunological memory maintained by long-lived plasma cells resident in the spleen, liver  
216 and bone marrow.

## 217 TCR repertoire analysis reveals patterns of clonal distribution and differentiation across 218 tissues

219 Most of the cells we captured are T cells or ILCs, including NK cells, further divided into 16  
220 sub-clusters (**Fig. 4A and 4B**). Naive/central memory CD8<sup>+</sup> and CD4<sup>+</sup> T cells were closely located  
221 and defined by high *CCR7* and *SELL* expression. Follicular helper T cells (T<sub>fh</sub>) expressing *CXCR5*,  
222 regulatory T cells (Tregs) expressing *FOXP3* and *CTLA4*, and other effector CD4<sup>+</sup> cells were also  
223 identified. MAIT cells were characterised by expression of *TRAV1-2* and *SLC4A10*. In the CD8<sup>+</sup>  
224 memory compartment, we found three major subsets characterized by expression of the chemokine  
225 receptors *CCR9* and *CX3CR1* as well as the activation molecule *CRTAM*. Furthermore, within the  $\gamma\delta$  T  
226 cell cluster we found expression of the integrin molecule *ITGAD* (CD11d). Notably, the NK cells were  
227 represented by two clusters, expressing high levels of either *FCGR3A* or *NCAM1*. The ILC3  
228 population, marked by *PCDH9* expression, was mixed in a cluster with NK cells. Tissue distribution of  
229 these populations reveals that whereas the majority of CD4<sup>+</sup> and ILC3 cells are located in the lymph  
230 nodes and to some extent in the spleen, cytotoxic T and NK cells are more abundant in the bone  
231 marrow, spleen and non-lymphoid tissues (**Fig. 4C**). Specifically within the CD8<sup>+</sup> T cells, *CCR9*<sup>+</sup> were  
232 enriched in the gut regions whereas *CX3CR1*<sup>+</sup> were absent from mesenteric and thoracic lymph  
233 nodes and *CRTAM*<sup>+</sup> were found in both lymphoid and non-lymphoid tissues. We validated and  
234 mapped this last population of *CD3D*<sup>+</sup>*CD8A*<sup>+</sup>*CRTAM*<sup>+</sup> T cells using single-molecule FISH (smFISH)  
235 in the liver and thoracic lymph nodes (**Fig. 4D and 4E**).

236 The analysis of T cell clonal distribution within different tissues of a single individual, and across  
237 different individuals is key to understanding T cell-mediated protection. We identified a total of 30,842  
238 cells with productive TCR $\alpha\beta$  chains. Chain pairing analysis showed that T cell clusters mostly  
239 contained a single pair of chains, with orphan and extra chains being present on a relatively small  
240 fraction of cells (**fig. S4A,B**). Notably, the frequency of extra  $\alpha$  chains (extra VJ) is more common than  
241 that of  $\beta$  chains (extra VDJ), thought to be due to more stringent and multi-layered allelic exclusion  
242 mechanisms at the TCR $\beta$  locus compared to TCR $\alpha$  (33). As expected, the NK and ILC clusters had no  
243 productive TCR and only a small proportion of the  $\gamma\delta$  T cell cluster had a productive TCR, which may  
244 be due to cytotoxic T cell co-clustering. We next examined V(D)J gene usage in relation to cell identity.  
245 We detected a significant enrichment of *TRAV1-2*, *TRAJ33* and *TRAJ12* in the MAIT population, as  
246 expected (**fig.S4C**). V(D)J usage bias analysis across tissues revealed a significant enrichment of  
247 *TRAJ12*, *TRBV6-4* and *TRBJ2-1* in liver MAIT cells versus *TRAJ33* and *TRBJ2-6* in splenic MAIT  
248 cells. Furthermore, we also found a significant enrichment of specific gene segments in the  
249 *CD8*<sup>+</sup>*CX3CR1*<sup>+</sup> population in the lung, bone marrow, liver, spleen and blood (**Fig. 4F**).

250 We then defined clonally related cells based on identical CDR3 nucleotide sequences to investigate  
251 TCR repertoires. Using this approach, we found that clonally expanded cells were primarily within the

memory CD8<sup>+</sup> compartment and the MAIT population (**fig. S4D**). This data reveals that detected clonotypes were restricted to single individuals, however, within donors, they were commonly found across tissues and subsets (**fig. S4E-G**). Focusing on expanded clonotypes (>20 cells), the majority of them were widespread across five or more tissues (**Fig. 4G**). We also found that several CD8<sup>+</sup>CCR9<sup>+</sup> T cell-enriched clonotypes were shared across different gut regions, and that several clonotypes present in the liver and lung consisted of a mixture of cells within both the CD8<sup>+</sup>CRTAM<sup>+</sup> and CD8<sup>+</sup>CX3CR1<sup>+</sup> populations.

## Two distinct subsets of $\gamma\delta$ T cells across human tissues

$\gamma\delta$  T cells are at the interface between adaptive and innate immune functions, and have recently attracted much attention due to their potential in cell-based therapies. Their accurate identification in single-cell studies remains a challenge due to their transcriptional similarity to cytotoxic  $\alpha\beta$  T cells and NK cells. We manually annotated a  $\gamma\delta$  T cell cluster expressing *ITGAD* encoding CD11d, which as part of a heterodimer with CD18 has the potential to interact with VCAM1(34). In the liver and the spleen, where we identified these  $\gamma\delta$  T cells, resident macrophages, such as red pulp macrophages and Kupffer cells, express high levels of *VCAM1* (**Fig. 2B, Fig. 5B**). We hypothesized that these  $\gamma\delta$  T cells may be interacting with resident macrophages and used smFISH to explore this possibility. Imaging of liver sections incubated with *TRDC* and *ITGAD* probes to identify *ITGAD*<sup>+</sup>  $\gamma\delta$  T cells and *CD5L* probes to mark Kupffer cells validated the presence of these populations and showed a number of *ITGAD*<sup>+</sup>  $\gamma\delta$  T cells in the vicinity of Kupffer cells (**Fig. 5B**). We also performed  $\gamma\delta$  TCR sequencing in selected spleen samples and found that productive  $\gamma\delta$  TCR were primarily part of the *ITGAD*-expressing  $\gamma\delta$  T cells (**fig. S5A**), further supporting the robust identification of these cells. Interestingly, CellTypist misclassified this population as cytotoxic-T cells and NK cells, but predicted a different group of cells within the CD8<sup>+</sup>CCR9<sup>+</sup> cluster as  $\gamma\delta$  T cells (**Fig. 5C, fig. S5B**), primarily derived from the gut. While both  $\gamma\delta$  T cell populations were positive for *TRDV1*, they presented differences in the expression of specific genes such as *ITGAD*, *CCR9*, *ITGAE* and *ITGA1* (**Fig. 5D**). Altogether, this showcases how a combination of CellTypist-based automated annotation, expert-driven cluster analysis and TCR sequencing can synergize to dissect specific and functionally relevant aspects of cell identity.

## Discussion

Here, we present the first multi-donor study of immune cells across the human body. We sampled multiple organs from individuals, which allowed for a more robust control of age, gender, medical history and sampling backgrounds, and consequently revealed tissue-specific expression patterns.

Achieving an accurate assignment of detailed cell identities in scRNA-seq experiments is a major challenge. We have developed CellTypist, a framework for automated cell type annotation of immune



285 populations. We obtain accurate assignments both for major cell types, but also for fine-grained  
 286 annotation that is typically time-consuming and requires expert knowledge. This has been largely  
 287 possible due to the curation of a collection of 22 studies across a range of tissues with an in-depth  
 288 immune cell analysis. Still, manual curation of cell clusters can reveal specific subtypes of cells that  
 289 may be absent from the database/training set and we showcase an example on the  $\gamma\delta$  T cell  
 290 compartment. To address this in the longer run, the CellTypist models will be periodically updated and  
 291 extended to non-immune and further immune sub-populations as more data becomes available in the  
 292 future.

293 Using CellTypist combined with manual annotation, we dissected the transcriptomic features of  
 294 immune cells across tissues. Within the myeloid compartment, macrophages showed the most  
 295 prominent features of tissue-specificity. It is well established that macrophages seed tissues during  
 296 development in mice (35) and recently direct evidence has also been reported in humans (36). We  
 297 here detect several of the resident macrophage subtypes such as red pulp macrophages, Kupffer cells  
 298 and related iron-recycling macrophages in bone marrow and lymph nodes. Cross-tissue  
 299 characterization of activated dendritic cells revealed specific expression of *CRLF2*, *CSF2RA* and  
 300 *GPR157* in the lung and *AIRE* in the thoracic lymph nodes. Transient expression of *AIRE* by aDCs  
 301 outside of the thymus has been reported (37), however, its functional implications remain unclear.  
 302 Moreover, signaling via TSLPR, encoded by *CRLF2*, has been shown to play a role in allergy and  
 303 asthma (38, 39).

304 In the lymphoid compartment, we combined transcriptome and VDJ analysis, which allowed the  
 305 phenotypic dissection of adaptive immune cells using complementary layers of cell identity. Of note,  
 306 we detected a subset of memory B cells expressing *ITGAX* and *TBX21*, that resembles populations  
 307 reported to expand upon malaria vaccination (40) and in systemic lupus erythematosus (SLE) patients  
 308 (41). In our data, these B cells do not show clonal expansion, suggesting that they may be present at  
 309 low levels in healthy individuals. BCR analysis revealed isotype usage bias towards IgA2 in gut  
 310 plasma cells, which may be related to structural differences (42) or higher resistance to microbial  
 311 degradation as compared to IgA1 (43). Cross-tissue clonal distribution of B cells and plasma cells has  
 312 been previously shown to follow two different patterns (31). In our study, due to limited sampling depth  
 313 in the B cell compartment, we primarily detect shared clones between the spleen and lymphoid organs  
 314 but can also detect a degree of sharing with non-lymphoid tissues including the gut. Notably, when we  
 315 incorporate cell identity and clonotype analysis we can distinguish that broadly distributed clones are  
 316 geared towards the B cell memory phenotype while tissue-restricted clones are more frequently  
 317 plasma cells. In the T-cell compartment, cross-tissue and cross-cell type TCR sharing reveals until  
 318 now unappreciated insights into the plasticity and distribution of T cell subtypes. Sharing between  
 319 CRTAM<sup>+</sup> and CX3CR1<sup>+</sup> subtypes of CD8<sup>+</sup> T cells supports the possibility that these transcriptomically  
 320 distinct populations may represent different stages of migration or tissue adaptation, such as the  
 321 differentiation of TEM to TRMs. Lastly, using a combination of automated annotation, manual curation

322 and  $\gamma\delta$  TCR sequencing, we found two distinct subsets of  $\gamma\delta$  T cells showing distinct marker genes  
323 and tissue distributions.

324 Overall, this study unraveled previously unrecognized features of tissue-specific immunity in the  
325 myeloid and lymphoid compartment and provides a comprehensive framework for future cross-tissue  
326 cell type analysis. Further investigation is needed to determine the effect of important covariates such  
327 as donor age and gender as well as considering the immune cell activation status, to gain a defining  
328 picture of how human biology influences immune function.

## 329 **Acknowledgements**

330 We thank the deceased organ donors, donor families and the Cambridge Biorepository for  
331 Translational Medicine for access to the tissue samples.

332 This research was supported by funding from the European Research Council (grant no. 646794  
333 ThDEFINE to S.A.T.) and the Wellcome Trust (grant no. RG79413 to J.J.). T.G. was supported by the  
334 European Union's H2020 research and innovation program "ENLIGHT-TEN" under the Marie  
335 Skłodowska-Curie grant agreement 675395. We acknowledge J. Eliasova and BioRender for graphical  
336 images. We thank Carlos Talavera-López and Natsuhiko Kumasaka for discussions on data analysis.  
337 We also acknowledge the support received from the Cellular Generation and Phenotyping (CGaP)  
338 core facility, the Cellular Genetics Informatics team and Core DNA Pipelines at the Wellcome Sanger  
339 Institute and the NIHR Cambridge Biomedical Research Centre (BRC-1215-20014). The views  
340 expressed here are those of the author(s) and not necessarily those of the NIHR or the Department of  
341 Health and Social Care. LBJ and JLJ were funded directly by the Wellcome Trust (RG79413).



## 342 Figures and figure legends

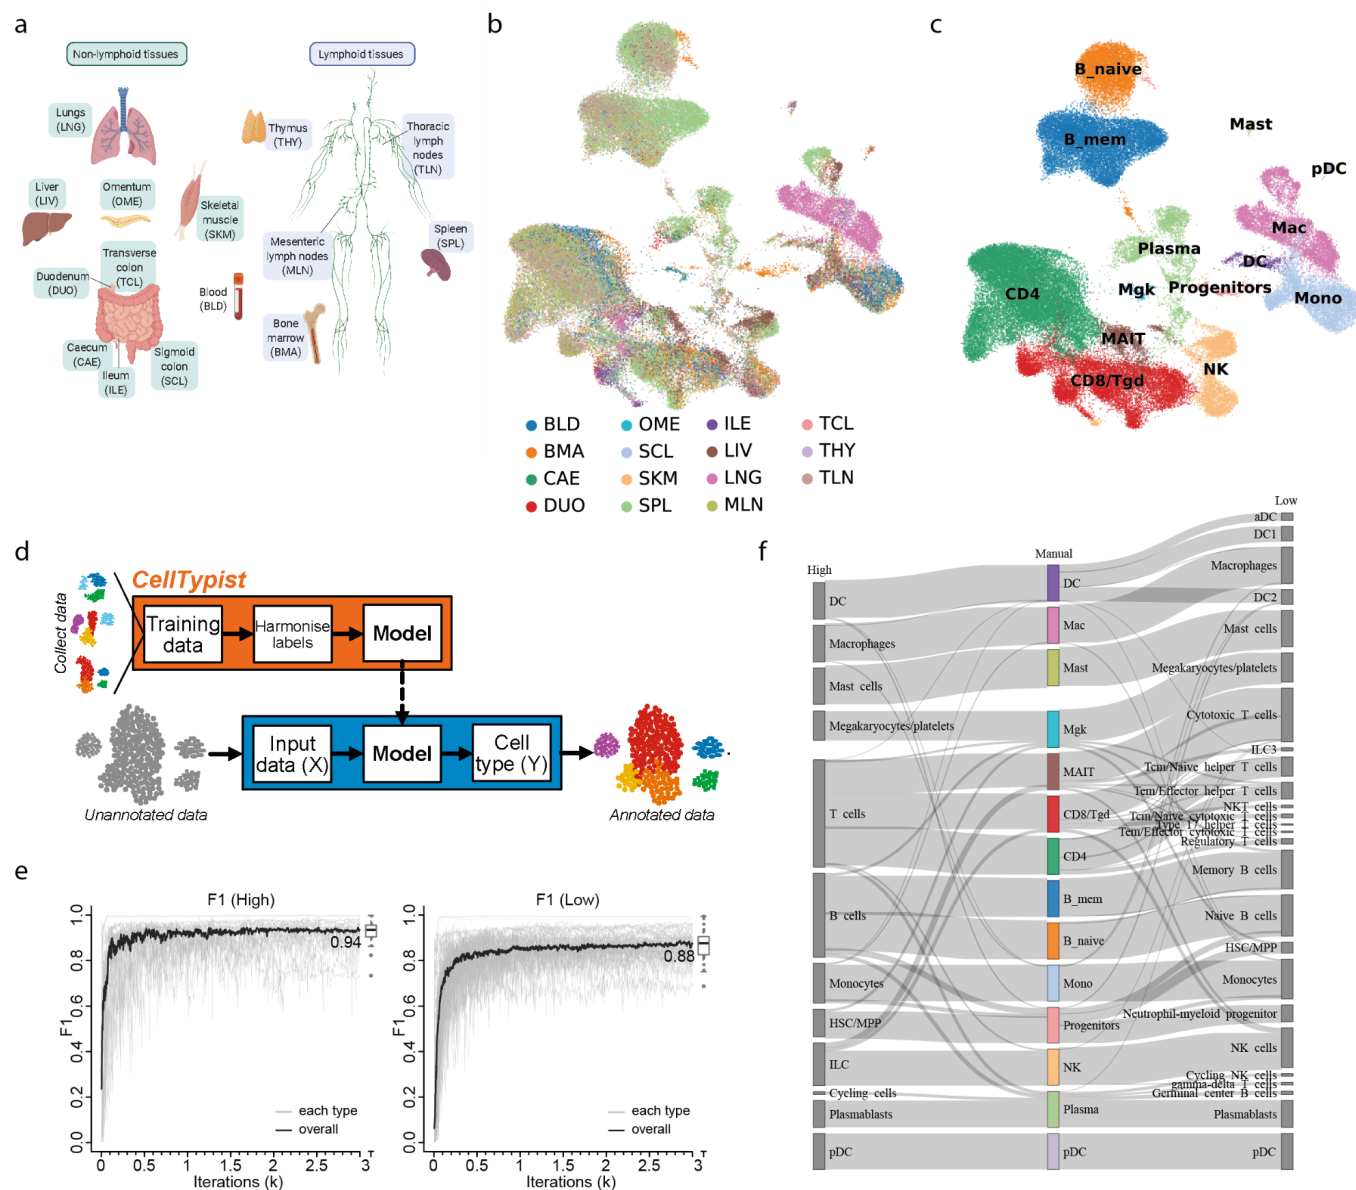

**343 Figure 1. Automated annotation of immune cells across human tissues using CellTypist. (A)**  
**344** Schematic of single-cell transcriptome profiling of human lymphoid and non-lymphoid tissues and their  
**345** assigned tissue name acronyms. **(B)** UMAP visualization of the immune cell compartment colored by  
**346** tissues. **(C)** UMAP visualization of the immune cell compartment colored by cell types. **(D)** Workflow of  
**347** CellTypist including data collection, model training and cell type prediction. **(E)** Performance curves  
**348** showing the F1 score at each iteration of training using mini-batch stochastic gradient descent for  
**349** high- and low-hierarchy CellTypist models, respectively. The black curve represents the median F1  
**350** score averaged across the individual F1 scores of all predicted cell types (grey curves). **(G)** Sankey  
**351** plot showing the fractions of CellTypist high-hierarchy model-derived labels (left) as compared to the  
**352** manually defined clusters (center), as well as the fractions of CellTypist low-hierarchy model-derived  
**353** labels (right).

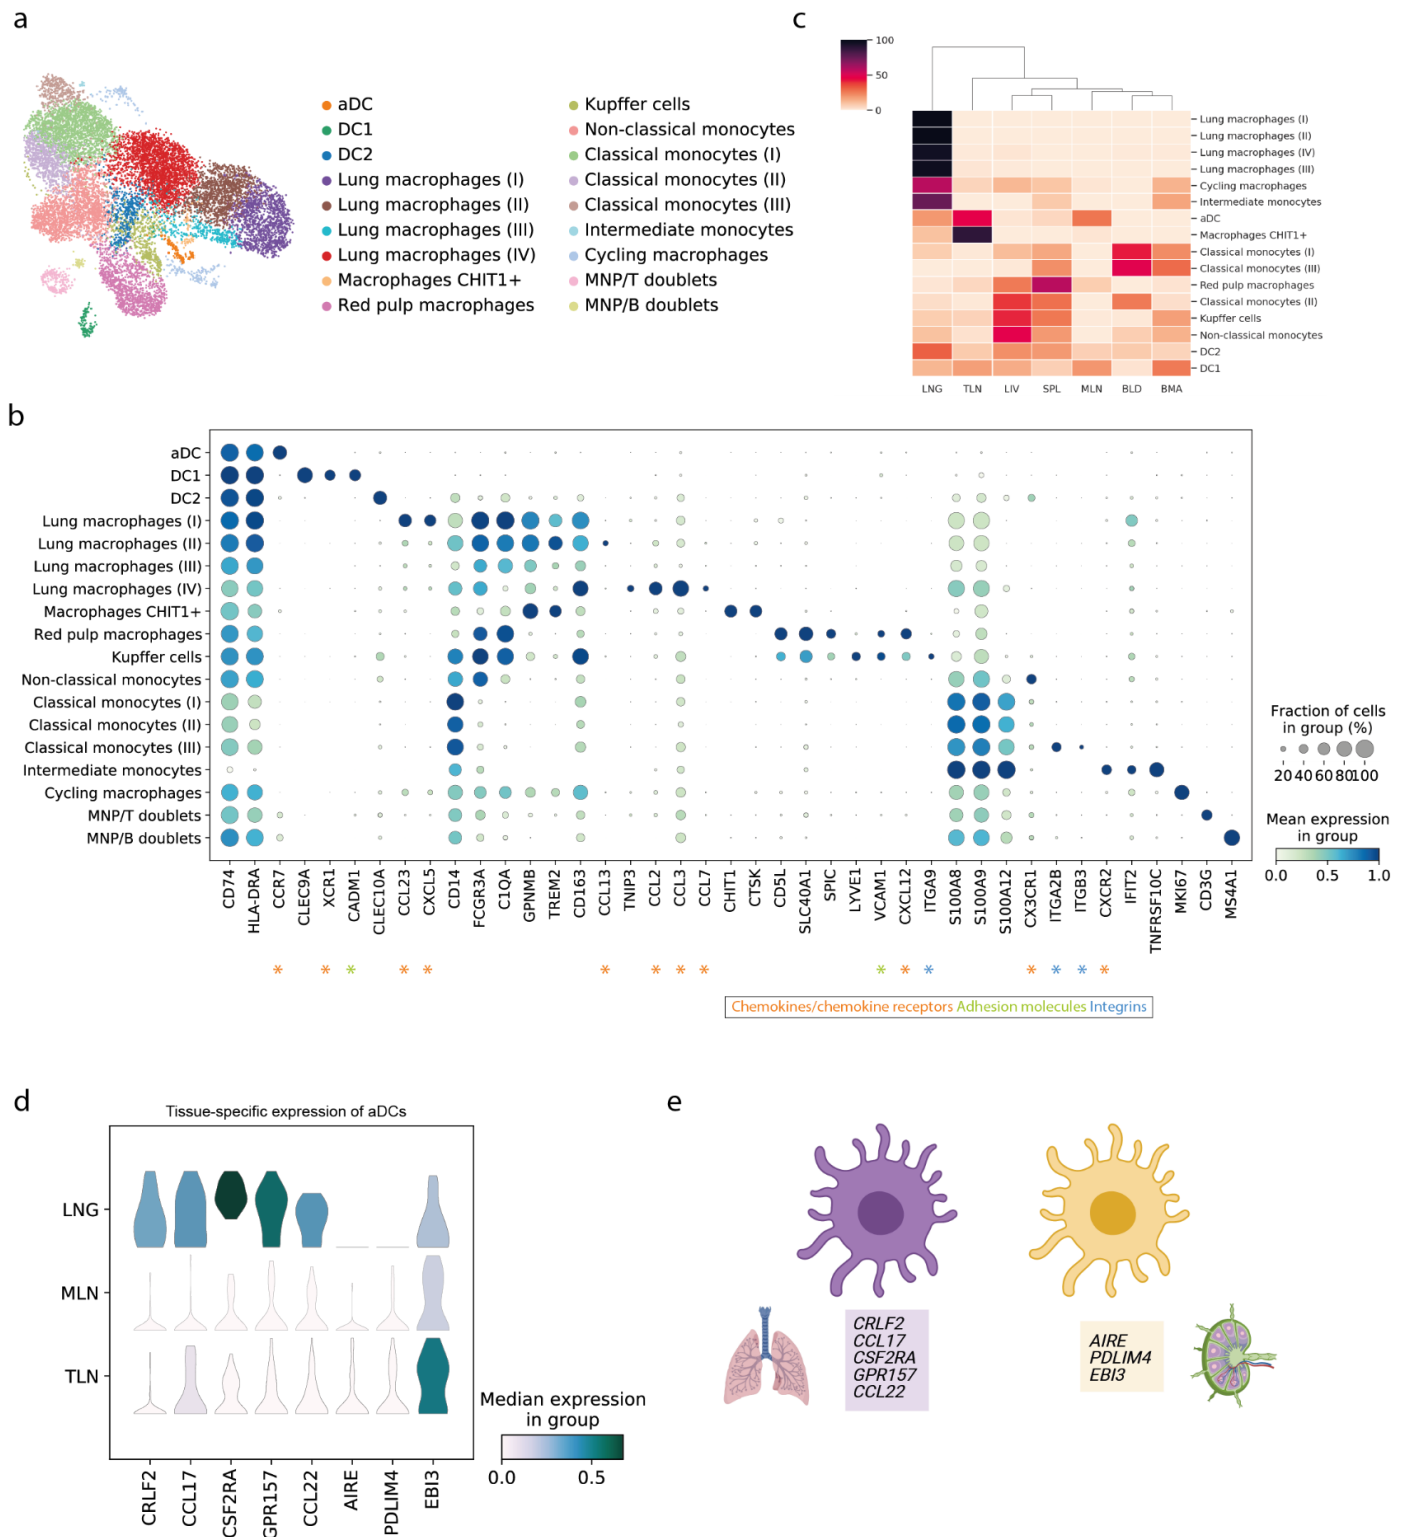

354 **Figure 2. Myeloid compartment across tissues.** (A) UMAP visualization of the cell populations in  
 355 the myeloid compartment. (B) Dot plot for expression of marker genes of the identified myeloid  
 356 populations. Color represents maximum-normalized mean expression of cells expressing marker  
 357 genes. (C) Clustermap showing the distribution of each myeloid cell population across the different  
 358 tissues. (D) Violin plot for genes differentially expressed in activated dendritic cells across tissues.  
 359 Color represents maximum-normalized mean expression of cells expressing marker genes. (E)  
 360 Schematic illustration of tissue-specific features of activated dendritic cells.

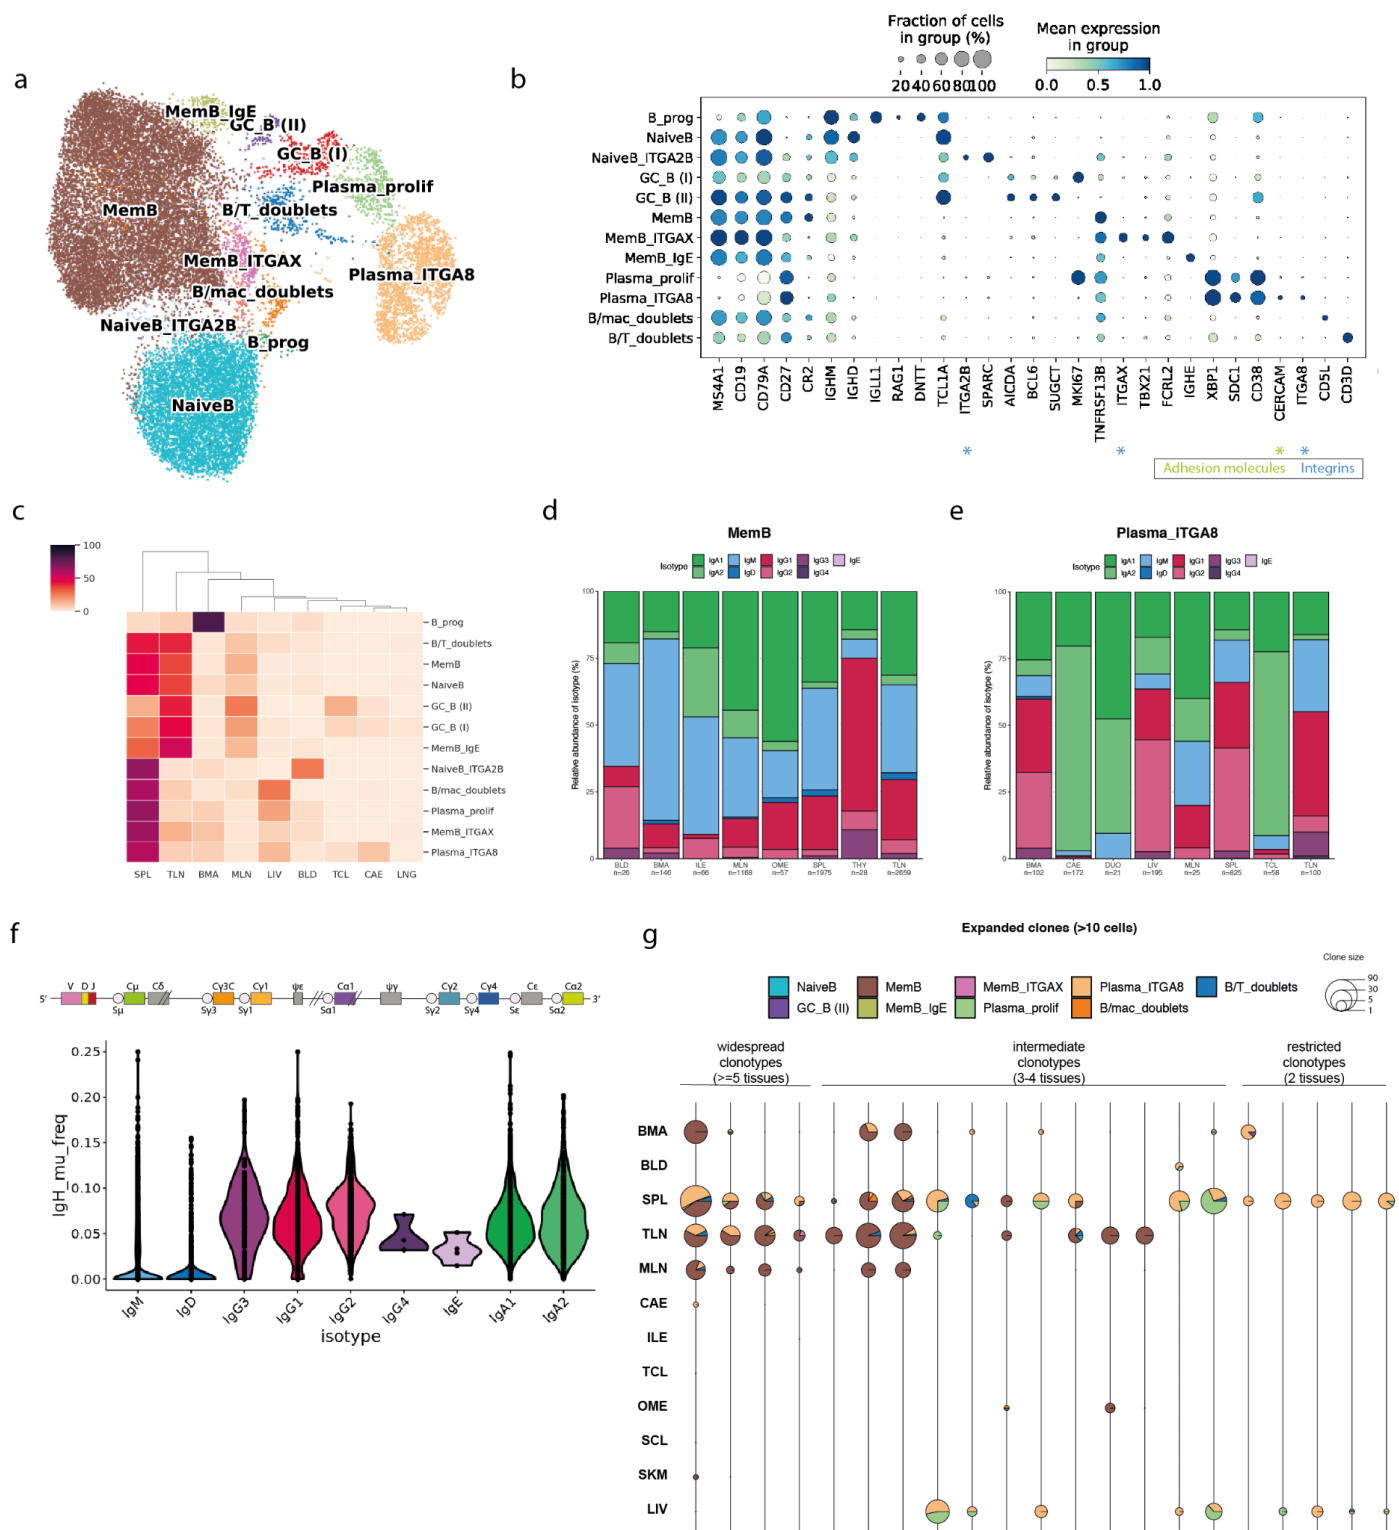

**Figure 3. B cell compartment across tissues.** (A) UMAP visualization of the cell populations in the B cell compartment. (B) Dot plot for expression of marker genes of the identified B cell populations. Color represents maximum-normalized mean expression of cells expressing marker genes. (C) Clustermap showing the distribution of each B cell population across the different tissues. (D) Stacked bar plot showing the isotype distribution per tissue within the memory B cells cluster and (E) the plasma cells cluster. (F) Violin plot of hypermutation frequency on the IgH chain across isotypes. (G) Scatterpie plot showing the tissue distribution and B cell subsets of expanded clonotypes (>10 cells). Each vertical line represents one clonotype. Clonotypes are grouped based on their tissue distribution.

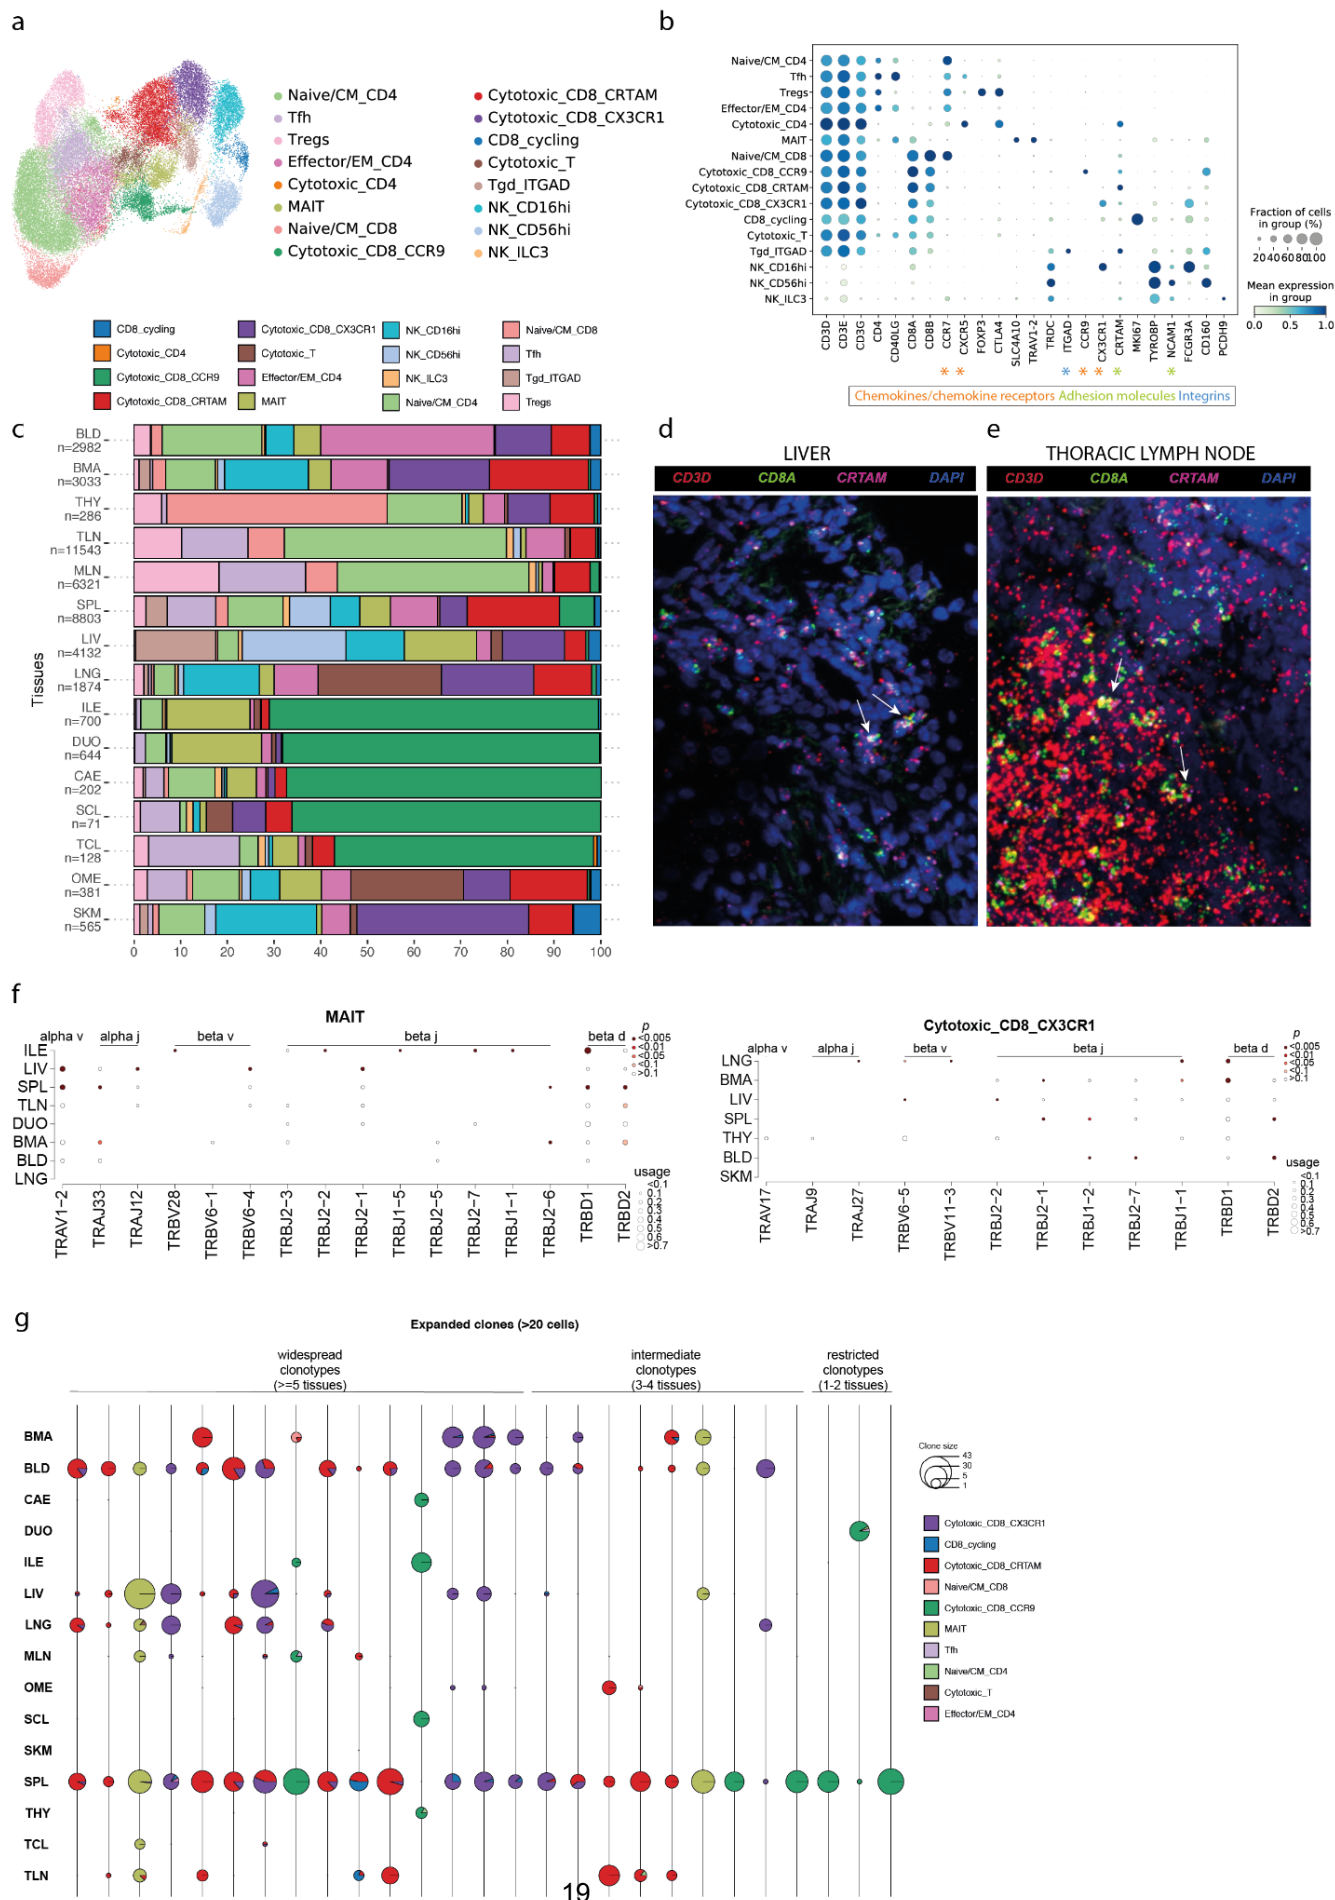



**Figure 4. TCR repertoire analysis reveals patterns of clonal distribution and differentiation across tissues.** (A) UMAP visualization of T cells and innate lymphoid cells (ILCs) across human tissues colored by cell type. (B) Dot plot for expression of marker genes of the identified immune populations. Color represents maximum-normalized mean expression of cells expressing marker genes. (C) Stacked barplot showing the distribution of each T cell or ILC population across the different tissues. (D,E) smFISH visualisation of *CD3D*, *CD8A* and *CRTAM* transcripts in a liver tissue section, validating this tissue-resident memory CD8<sup>+</sup> T cell population in the liver and thoracic lymph node. (F) Dot plots denoting the TRA and TRB V(D)J usage across tissues for MAIT cells (left) and CX3CR1<sup>+</sup> CD8<sup>+</sup> T cells (right). Only gene segments with a usage of greater than 10% in at least one tissue are included in the plots, with the sizes of dots indicating the gene segment usage and the colors indicating the significance of the difference between a given tissue and the remaining tissues. Significance is assessed by the generalized linear model stratified by donors with a Poisson structure. (G) Scatterpie plot showing the tissue distribution and T cell subsets of expanded clonotypes (>20 cells). Each vertical line represents one clonotype. Clonotypes are grouped based on their tissue distribution.



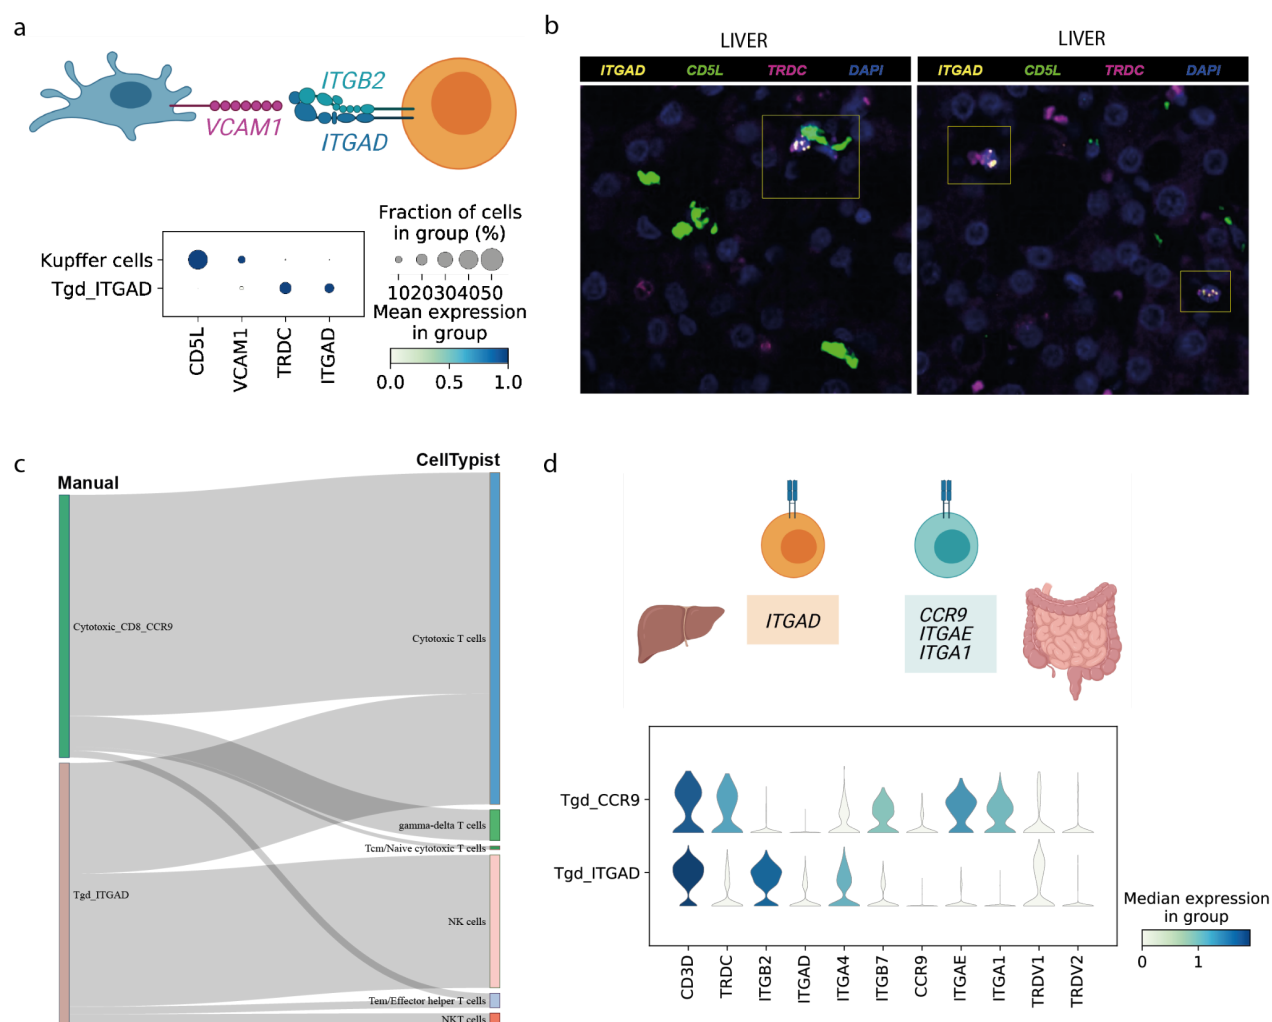

384 **Figure 5. Two distinct subsets of  $\gamma\delta$  T cells across human tissues.** (A,B) smFISH visualisation of  
 385 *CD5L* (marking Kupffer cells), *TRDC* and *ITGAD* transcripts in a liver tissue section, supporting the  
 386 existence of these cell populations and their interaction. (C) UMAP visualization of the  $\gamma\delta$ TCR  
 387 sequencing. (D) Stacked barplot showing proportion of T and ILC subsets according to  $\gamma\delta$ TCR chain  
 388 pairing information. (E) *CCR9*-expressing  $\gamma\delta$  T cells identified using CellTypist. (F) Dot plot for  
 389 expression of marker genes of the identified  $\gamma\delta$  T cell subsets. Color represents maximum-normalized  
 390 mean expression of cells expressing marker genes.

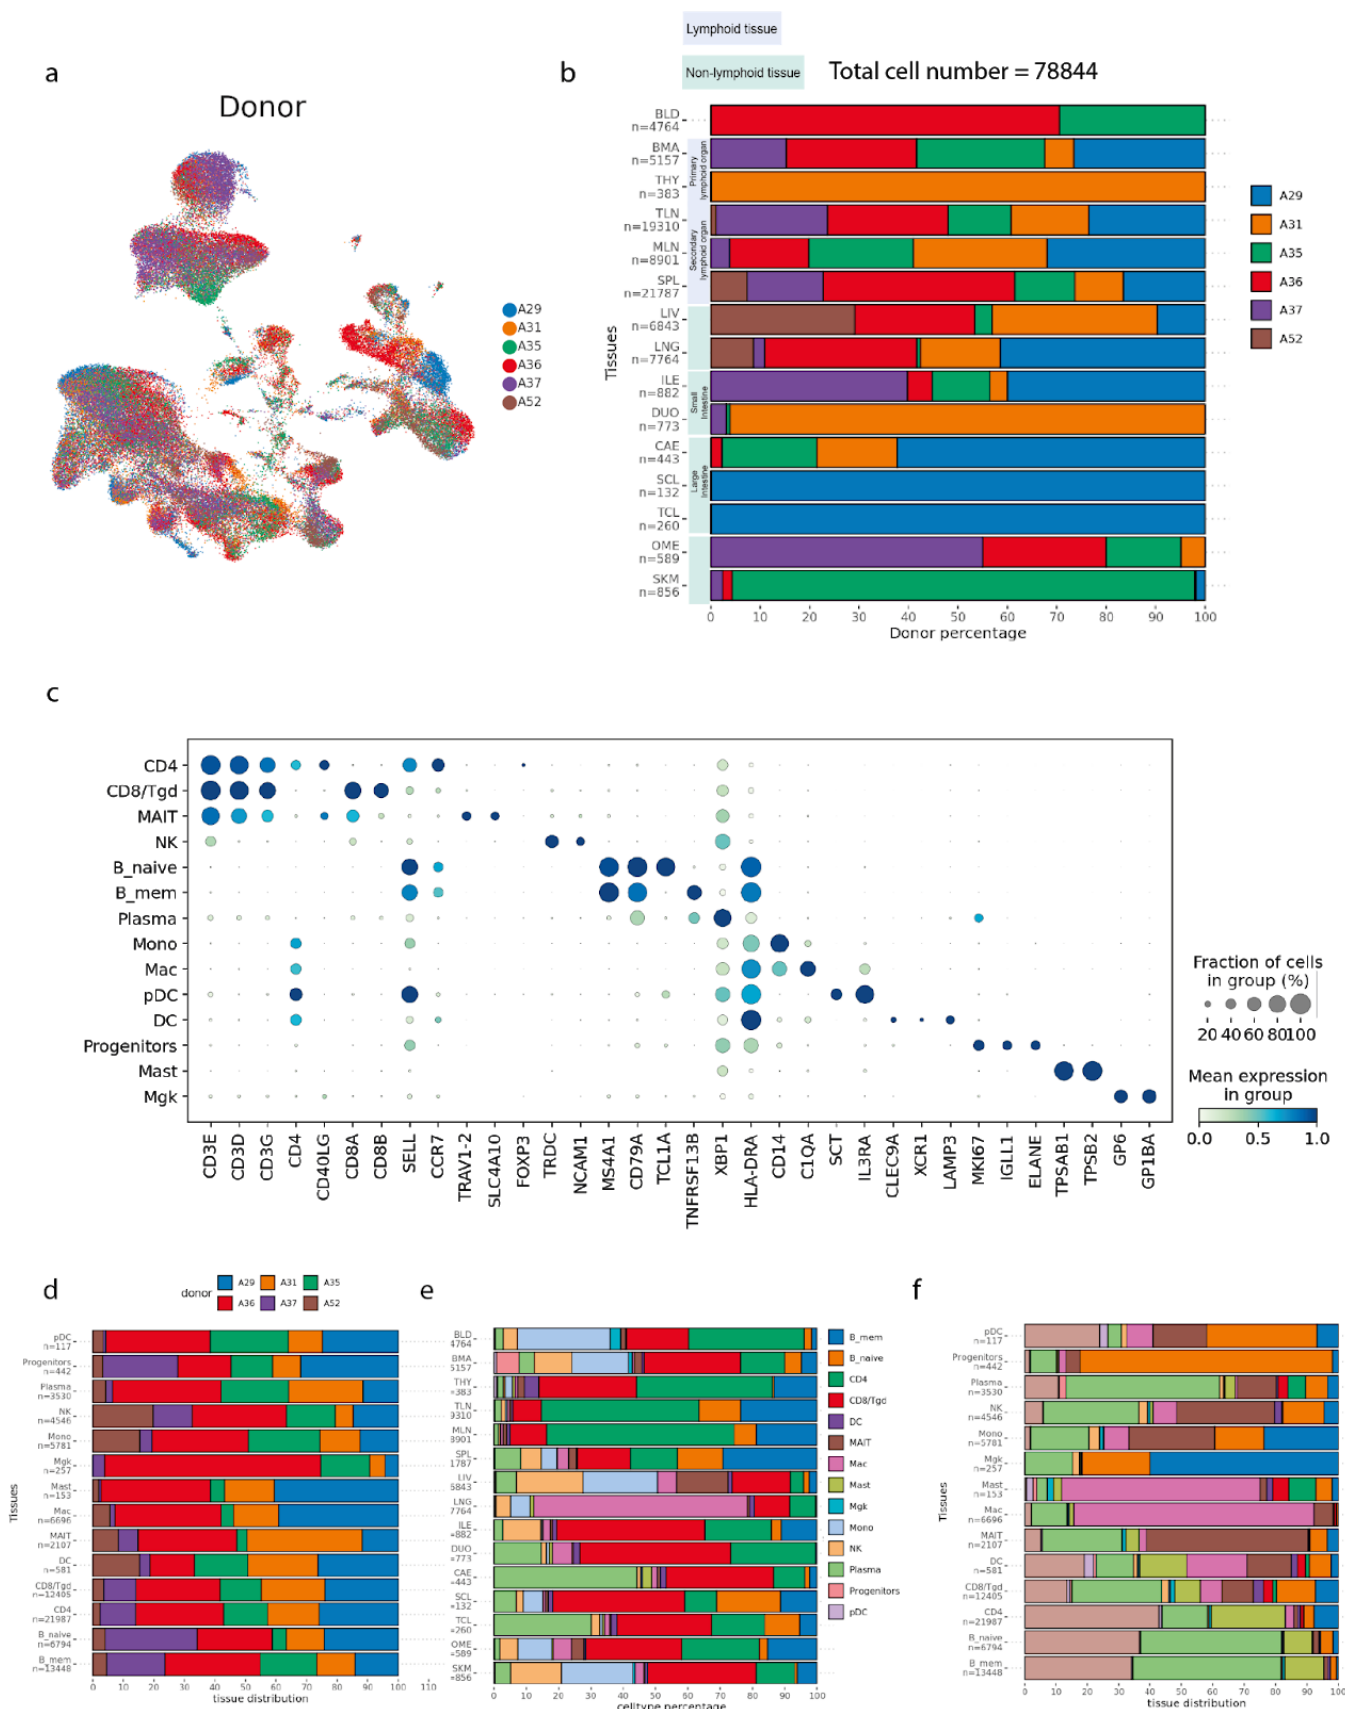

391 **Supplementary Figure 1. (A,B)** UMAP visualization showing the tissue and donor distribution. **(C)**  
 392 Stacked barplots showing the number and percentage of immune cell types per donor. **(D)** Dot plot for  
 393 expression of marker genes of the identified immune populations. Color represents  
 394 maximum-normalized mean expression of cells expressing marker genes. **(E,F)** Stacked barplots  
 395 showing the number and percentage of immune cell types per tissue and cells from a given cell type  
 396 across tissues.

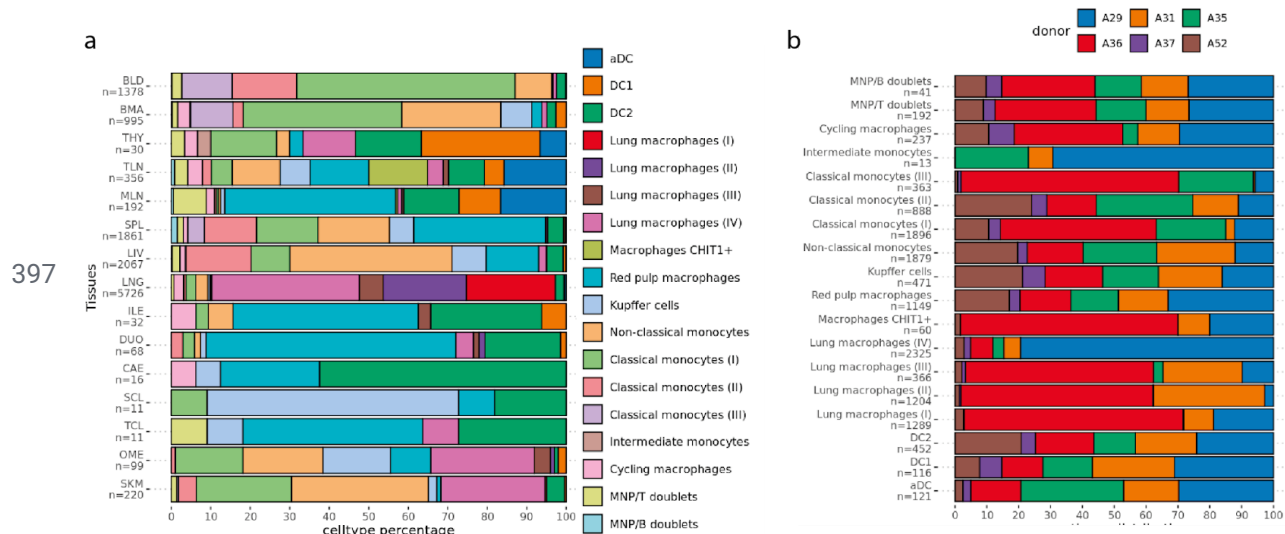

**Supplementary Figure 2.** Stacked barplots showing the proportion of myeloid cells obtained (A) per tissue and cellular subtype and (B) per cellular subtype and donor. The number of cells per category is identified on the left side of the plot.

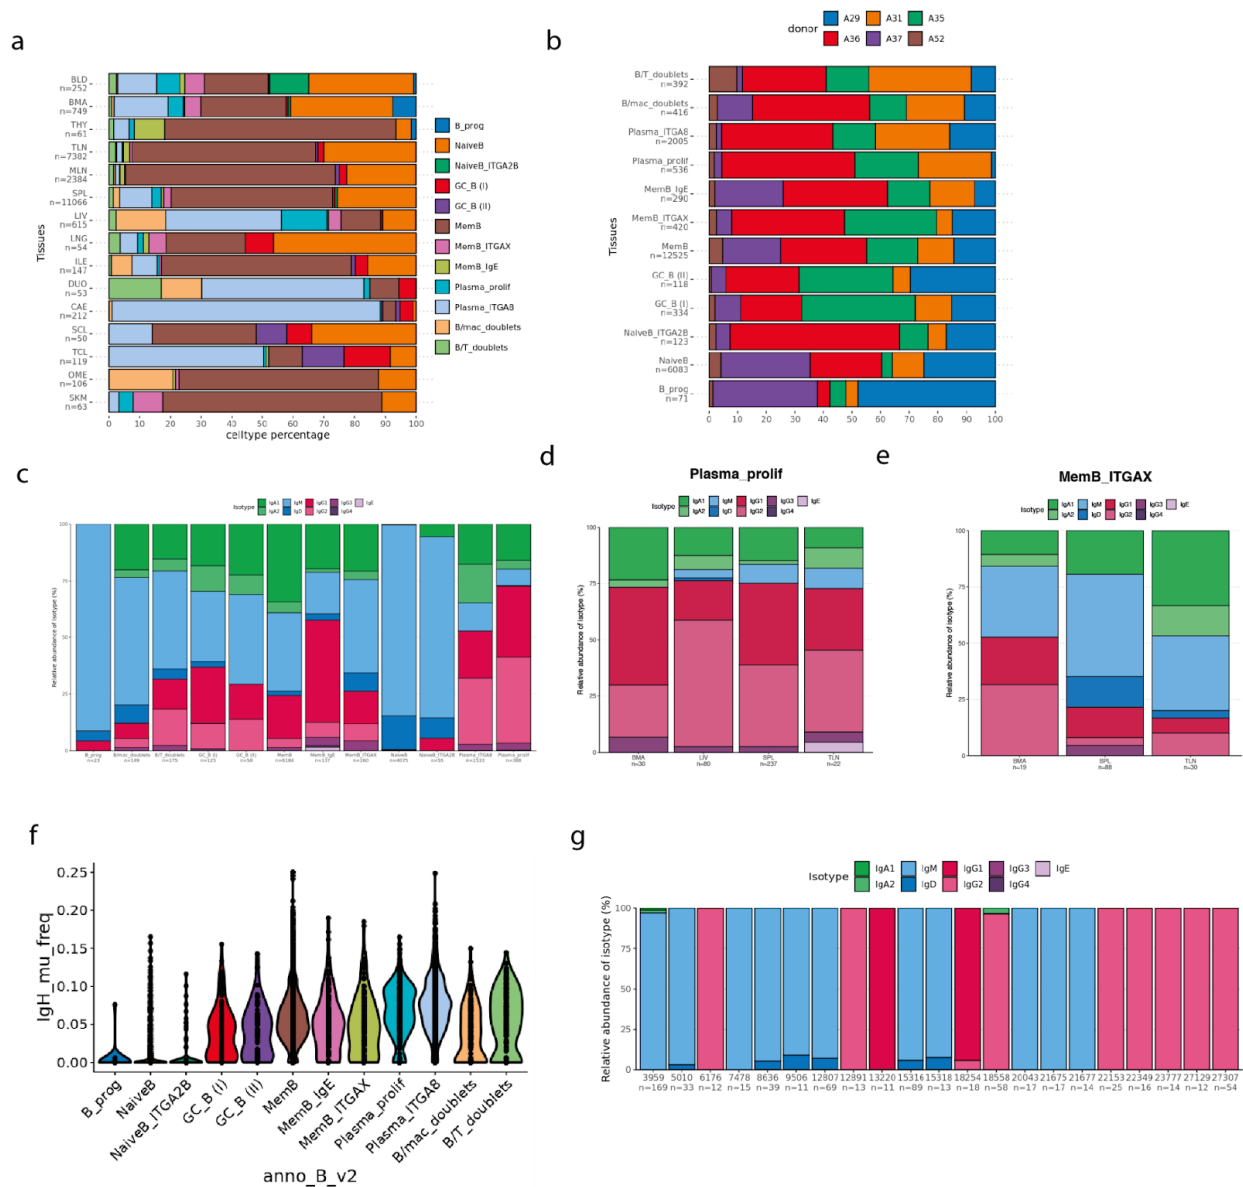

**Supplementary Figure 3. (A)** Stacked barplot showing the proportion of B cell subtypes by tissue. **(B)** Stacked barplot showing the donor distribution of each B cell subtypes. Stacked bar plot showing the isotype distribution across B cell subsets **(C)**, within the plasmablasts across tissues **(D)** and within the *ITGAX*<sup>+</sup> memory B cells across tissues **(E)**. **(F)** Violin plot showing hypermutation frequency across b cell subsets. **(G)** Isotype distribution across 21 expanded clonotypes.

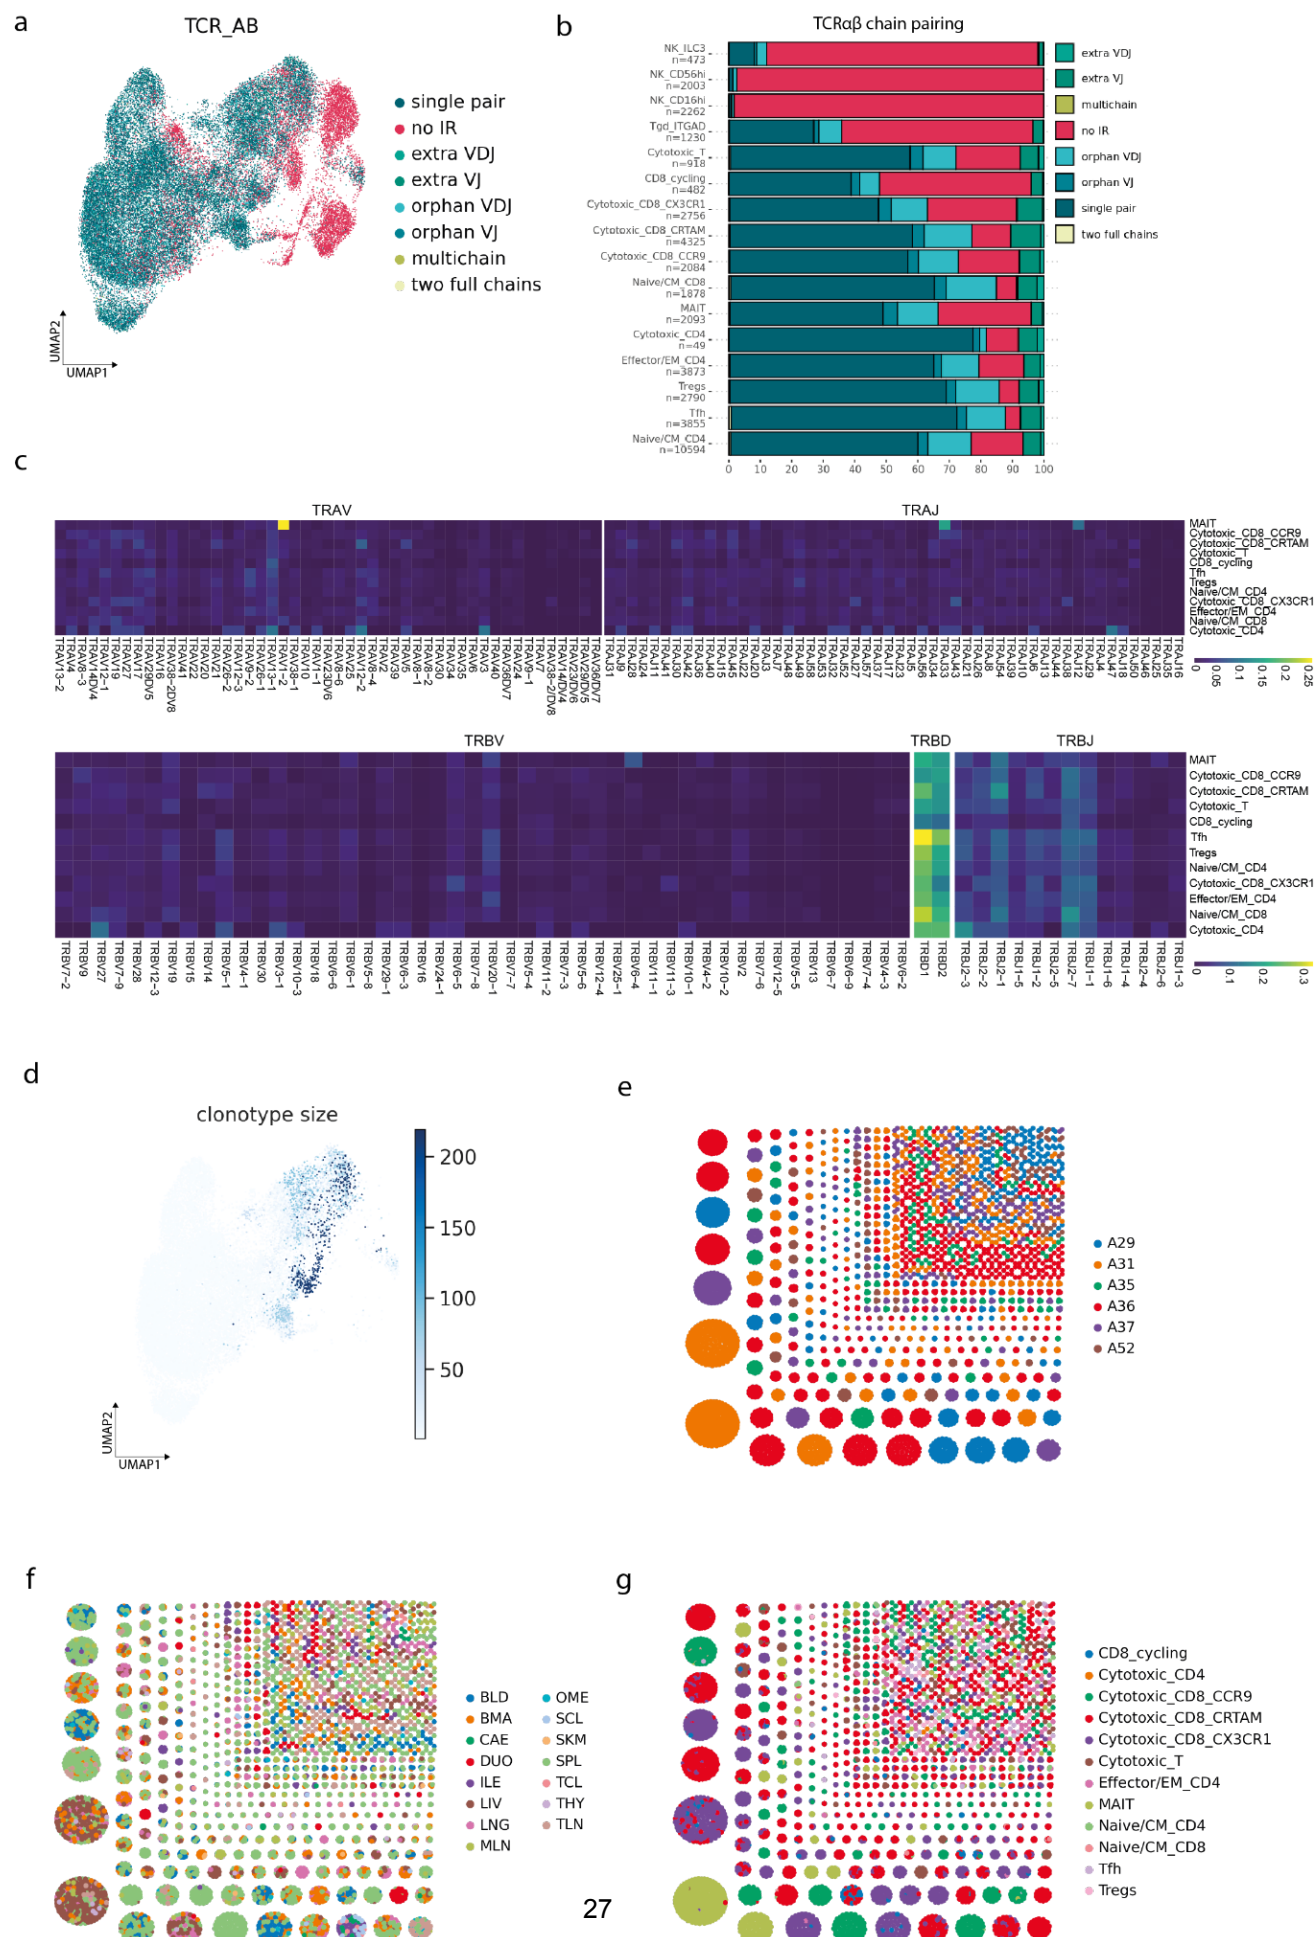

406

27

407 **Supplementary Figure 4. (A)** UMAP showing TCRab chain pairing. **(B)** Proportion of TCR $\alpha\beta$  chain  
 408 pairing by subset. **(C)** Heatmap showing relative usage of V(D)J genes across T cell subsets. **(D)**  
 409 UMAP showing clonal expansion of the TCRab T cells. **(E, F, G)** Clonotype network color coded by  
 410 donor, tissue and T cell subset.



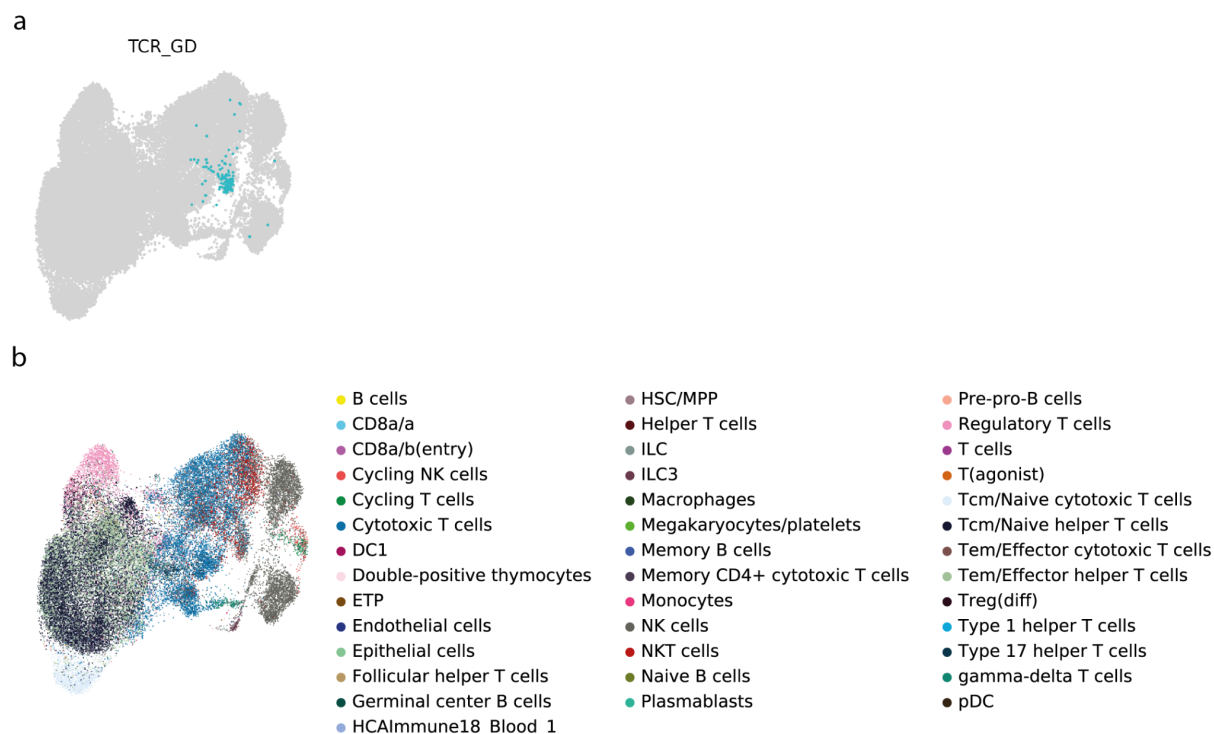

**Supplementary Figure 5. (A)** UMAP showing cells with a pair of productive  $\gamma\delta$  TCR chains. Data from two spleen samples. **(B)** UMAP showing the cell type labels predicted by CellTypist on the T and ILC compartment.

## 414 **Materials and methods**

### 415 Tissue acquisition

416 All work was completed under ethically approved studies. Tissue was obtained from deceased organ  
417 donors following circulatory death (DCD) via the Cambridge Biorepository for Translational Medicine  
418 (CBTM, <https://www.cbtm.group.cam.ac.uk/>), REC 15/EE/0152. Briefly, donors proceeded to organ  
419 donation after cessation of circulation. Organs were then perfused *in situ* with cold organ preservation  
420 solution and cooled with topical application of ice. Samples for the study were obtained within 60  
421 minutes of cessation of circulation and placed in University of Wisconsin (UW) organ preservation  
422 solution for transport at 4°C to the laboratory. Gut samples were taken from the locations indicated in  
423 Figure 1. Additional samples were obtained from the left lower lobe of the lung and the right lobe of the  
424 liver. Skeletal muscle was taken from the third intercostal space and bone marrow was obtained from  
425 the vertebral bodies. In addition, two donor-matched blood samples were taken just prior to treatment  
426 withdrawal, under REC approval 97/290.

### 427 Donor metadata table

| Donor ID | Sex | Age   | Primary cause of death | Multitrauma | Days in hospital | BMI   | CMV/EBV/TOXO    | Smoking | Alcohol (u/day) | Antibiotics within 2 weeks of death                                                  | Steroids                     |
|----------|-----|-------|------------------------|-------------|------------------|-------|-----------------|---------|-----------------|--------------------------------------------------------------------------------------|------------------------------|
| A29      | F   | 65-70 | ICH                    | Y           | 2                | 30-35 | CMV+/EBV+/TOXO- | N/K     | <1              | Nil                                                                                  | N                            |
| A31      | M   | 50-55 | ICH                    | Y           | 8                | 30-35 | CMV+/EBV+/TOXO- | Y       | <1              | Co-amoxiclav, Tazocin                                                                | N                            |
| A35      | M   | 60-65 | ICH                    | N           | 2                | 20-25 | CMV-/EBV+/TOXO- | Y       | >9              | Gentamicin, Flucloxacillin                                                           | Y Dexamethasone              |
| A37      | F   | 55-60 | ICH                    | N           | 3                | 20-25 | CMV-/EBV+/TOXO- | Y       | >9              | Co-amoxiclav                                                                         | N                            |
| A36      | M   | 70-75 | ICH                    | N           | 5                | 25-30 | CMV-/EBV+/TOXO+ | Y       | <2              | Amoxicillin (pre-admission) Flucloxacillin, Gentamicin, Clarithromycin, Co-amoxiclav | Y Prednisolone pre-treatment |
| A52      | M   | 60-65 | ICH                    | N           | 2                | 35-40 | CMV-/EBV+/TOXO- | N/K     | N/K             | Co-amoxiclav                                                                         | N                            |

428 F = Female; M = Male; ICH = intracranial haemorrhage; CMV = Cytomegalovirus; EBV= Epstein-Barr virus; TOXO =  
429 Toxoplasmosis; N/K=not known; Y = Yes; N = No

### 430 Tissue processing

431 All tissues were processed using a uniform protocol. Briefly, solid tissues were transferred to a 100mm  
432 tissue culture dish, cut into small pieces and transferred to C-tubes (Miltenty Biotec) at a maximum of  
433 5g/tube in 5mL of X-vivo15 media containing 0.13U/mL Liberase TL (Roche), 10U/mL DNase  
434 (benzonase nuclease, Millipore/Merck) supplemented with 2% (v/v) heat-inactivated fetal bovine

435 serum (FBS; Gibco), penicillin (100 U/ml, Sigma-Aldrich), streptomycin (0.1 mg/ml, Sigma-Aldrich),  
 436 and 10mM HEPES (Sigma Aldrich). The samples were then dissociated using a GentleMACS Octo  
 437 dissociator (Miltenyi Biotec) using a protocol that provided gradual ramping up of homogenisation  
 438 speed along with 2x 15 minute heating/mixing steps at 37°C. Digested tissue was filtered through a  
 439 70-µm MACS Smartstrainer (miltenyi biotec) and washed with media containing 2mM EDTA, prior to  
 440 washing with PBS. A ficoll density centrifugation step (400g for 30min at RT) was performed to isolate  
 441 mononuclear cells (MNCs). After gradient centrifugation, cells were washed once with PBS prior to  
 442 counting and resuspending in 10X buffer (PBS containing 0.04% (v/v) BSA).

443 Bone marrow aspirates and blood samples were diluted 1:1 with PBS and layered directly onto ficoll  
 444 for mononuclear cell isolation as described above. Cells taken from the interphase layer were washed  
 445 with PBS and exposed to the same enzymatic conditions as solid tissues by resuspending cell pellets  
 446 in tissue dissociation media containing liberase TL for 30 minutes at 37°C prior to counting and  
 447 resuspending in 10X buffer.

#### 448 Single-cell RNA sequencing

449 For scRNA-seq experiments, single cells were loaded onto the channels of a Chromium chip (10x  
 450 Genomics) for a target recovery of 5000 cells. Single-cell cDNA synthesis, amplification, and  
 451 sequencing libraries were generated using the Single Cell 5' Reagent Kit following the manufacturer's  
 452 instructions. The libraries from up to eight loaded channels were multiplexed together and sequenced  
 453 on an Illumina NovaSeq. The libraries were distributed over eight lanes per flow cell and sequenced at  
 454 a target depth of 50,000 reads per cell using the following parameters: Read1: 26 cycles, i7: 8 cycles,  
 455 i5: 0 cycles; Read2: 98 cycles to generate 75-bp paired-end reads. VDJ libraries for B and T cells  
 456 were sequenced on HiSeq 4000.

#### 457 Single-cell RNA sequencing data pre-processing

458 scRNA-seq data was aligned and quantified using the cellranger software (version 3.0.2, 10x  
 459 Genomics Inc.) using the GRCh38 human reference genome (official Cell Ranger reference, version  
 460 1.2.0). Cells with fewer than 1000 UMI counts and 600 detected genes were excluded from  
 461 downstream analysis. scTCR-seq data was aligned and quantified using the cellranger-vdj software  
 462 (version 2.1.1, 10x Genomics Inc). scBCR-seq data was aligned and quantified using the  
 463 cellranger-vdj software (version 4.0, 10x Genomics Inc).

#### 464 Doublet detection

465 Doublet detection was performed using the scrublet algorithm  
 466 (<https://github.com/AllonKleinLab/scrublet>,(44)) with percolation as previously described in a per  
 467 sample basis(45). Briefly, scrublet scores were obtained per cell. The percolation step was performed  
 468 on over-clustered data using the *scanpy.tl.louvain* function from the scanpy package. Scrublet was  
 469 run, obtaining per-cell doublet scores. The standard Seurat-inspired Scanpy processing pipeline was  
 470 performed up to the clustering stage, using default parameters. Each cluster was subsequently  
 471 separately clustered again, yielding an over-clustered manifold, and each of the resulting clusters had  
 472 its Scrublet scores replaced by the median of the observed values. The resulting scores were  
 473 assessed for statistical significance, with P values computed using a right-tailed test from a normal  
 474 distribution centred on the score median and a median absolute deviation (MAD)-derived standard  
 475 deviation estimate. The P-values were corrected for false discovery rate with the Bonferroni  
 476 procedure, and a significance threshold of 0.01 was imposed. Clusters with a scrublet score above 0.6  
 477 were flagged as potential doublet clusters and removed from further downstream biological analysis.

#### 478 Clustering, batch alignment and annotation

479 Downstream analysis included data normalisation (*scanpy.pp.normalize\_per\_cell* method, scaling  
 480 factor 10000), log-transformation (*scanpy.pp.log1p*), variable gene detection  
 481 (*scanpy.pp.filter\_gene\_dispersion*), data feature scaling (*scanpy.pp.scale*), PCA analysis  
 482 (*scanpy.pp.pca*, from variable genes), batch-balanced neighbourhood graph building  
 483 (*scanpy.pp.bbkn*) and Louvain graph-based clustering (*scanpy.tl.leiden*, clustering resolution  
 484 manually adjusted) performed using the python package scanpy (version 1.6.0). Cluster cell identity  
 485 was assigned by manual annotation using known marker genes as well as computed differentially  
 486 expressed genes (DEGs). Differential expression across clusters was assessed using rank biserial  
 487 correlation (<https://github.com/Teichlab/rbcde>) and *markers.py* functions from the thymus atlas  
 488 (<https://github.com/Teichlab/thymusatlas>) (14). Cross-tissue differential expression was assessed  
 489 using a ridge regression model that included an interaction term for tissue and cell type. For each  
 490 tissue, genes were ranked according to their coefficients specific to the given interaction term  
 491 associated with the tissue of interest. To achieve a high-resolution annotation, we sub-clustered T, B  
 492 and myeloid cells and repeated the procedure of variable gene selection, which allowed for  
 493 fine-grained cell type annotation. Donor-dependent batch effects were aligned using the  
 494 *scanpy.pp.bbkn* function and we used the batch-aligned manifold to annotate cell types.

## 495 CellTypist

496 Full details on the data collection, processing, curation, model training, and testing of the CellTypist  
497 pipeline can be found in the **Supplementary Note**.

## 498 scTCR-seq downstream analysis

499 VDJ sequence information was extracted from the output file “filtered\_contig\_annotations.csv” using  
500 the scirpy package(46). We determined productive TCR chain pairing features using the  
501 *scirpy.tl.chain\_pairing()* function and selected cells with a single pair of productive  $\alpha\beta$  TCR chains for  
502 downstream analysis. Bias in VDJ usage was estimated using the generalized linear model (glm) on  
503 the basis of the Poisson family. Specifically, for each gene segment, we calculated the number of cells  
504 with this segment in each donor of a given tissue, and then compared their distributions with the  
505 remaining tissues which were stratified by donors as well. During the glm fitting, the total number of  
506 cells in each donor of a given tissue was logarithmized and used as the offset, accounting for the  
507 variance imposed by rate estimation. Clonotypes were determined using the *scirpy.pp.tcr\_neighbors()*  
508 function using the CDR3 nucleotide sequence identity from both TCR chains as a metric.

## 509 scBCR-seq downstream analysis

510 VDJ sequence information was extracted from the output file “filtered\_contig\_annotations.csv”. Further  
511 single-cell VDJ analysis for B cells was performed broadly as described previously (15, 47), with all  
512 sequences from a given patient grouped together for analysis. AssignGenes.py(48) and IgBLAST(49)  
513 were used to reannotate IgH sequences prior to correction of ambiguous V gene assignments using  
514 TIgGER (v1.0.0)(50). Clonally-related IgH sequences were identified using DefineClones.py with a  
515 nearest neighbour distance threshold of 0.15 before running CreateGermlines.py (ChangeO)(51) to  
516 infer germline sequences for each clonal family and calculate somatic hypermutation frequencies with  
517 observedMutations (Shazam)(51). IgH diversity analyses were performed using the rarefyDiversity  
518 and testDiversity of Alakazam (v1.0.2; (51)). scVDJ sequences were then integrated with single-cell  
519 gene expression objects by determining the number of high quality annotated IgH, IgK or IgL per  
520 unique cell barcode. If more than one contig per chain was identified, metadata for that cell was  
521 ascribed as “Multi”. To assess clonal relationships between scRNA-seq clusters, co-occurrence of  
522 expanded clone members between cell types and tissues was reported as a binary event for each  
523 clone that contained a member within two different cell types or tissues in single-cell repertoires.

## 524 Single molecule FISH

525 Samples were either snap frozen in chilled isopentane (-40°C for striated muscle, -70°C for other  
526 tissues) or fixed in 10% NBF, dehydrated through an ethanol series, and embedded in paraffin wax.  
527 Samples were run using the RNAscope 2.5 LS fluorescent multiplex assay (automated). Briefly, FFPE  
528 tissue sections (5 µm) and fresh frozen tissue sections (10µm) were cut. Fresh frozen tissues were  
529 pre-treated offline (4% PFA fixation 4°C 15 mins followed by 90mins at room temperature, sequential  
530 dehydration steps (50%, 70%, 100%, 100% ethanol, air dry)) and protease III was used. FFPE tissues  
531 required no pretreatment offline, but a Heat Induced Epitope Retrieval (HIER) step was performed by  
532 the instrument for 15mins using Epitope Retrieval 2 (ER2) at 95°C. These tissues also had protease III  
533 treatment. RNAscope probes used included Hs-CD3D-C2 (599398-C2), Hs-CD8A-C3 (560398-C3),  
534 Hs-CRTAM (430248), Hs-TRDC (433678), Hs-ITGAD-C2 (881498-C2), Hs-CD5L-C3 (850518-C3).  
535 Opal fluorophores (Opal 520, Opal 570 and Opal 650) were used at 1:300 dilution. Slides were  
536 imaged on the Perkin Elmer Opera Phenix High-Content Screening System, in confocal mode with 1  
537 µm z-step size, using 20X (NA 0.16, 0.299 µm/pixel) and 40X (NA 1.1, 0.149 µm/pixel)  
538 water-immersion objectives.

## 539 References

- 540 1. D.-M. Popescu, R. A. Botting, E. Stephenson, K. Green, S. Webb, L. Jardine, E. F. Calderbank, K.  
541 Polanski, I. Goh, M. Efremova, M. Acres, D. Maunder, P. Vegh, Y. Gitton, J.-E. Park, R.  
542 Vento-Tormo, Z. Miao, D. Dixon, R. Rowell, D. McDonald, J. Fletcher, E. Poyner, G. Reynolds, M.  
543 Mather, C. Moldovan, L. Mamanova, F. Greig, M. D. Young, K. B. Meyer, S. Lisgo, J. Bacardit, A.  
544 Fuller, B. Millar, B. Innes, S. Lindsay, M. J. T. Stubbington, M. S. Kowalczyk, B. Li, O. Ashenberg,  
545 M. Tabaka, D. Dionne, T. L. Tickle, M. Slyper, O. Rozenblatt-Rosen, A. Filby, P. Carey, A.-C.  
546 Villani, A. Roy, A. Regev, A. Chédotal, I. Roberts, B. Göttgens, S. Behjati, E. Laurenti, S. A.  
547 Teichmann, M. Haniffa, Decoding human fetal liver haematopoiesis. *Nature*. **574**, 365–371 (2019).
- 548 2. L. C. Davies, S. J. Jenkins, J. E. Allen, P. R. Taylor, Tissue-resident macrophages. *Nat. Immunol.*  
549 **14**, 986–995 (2013).
- 550 3. E. Gomez Perdiguero, K. Klapproth, C. Schulz, K. Busch, E. Azzoni, L. Crozet, H. Garner, C.  
551 Trouillet, M. F. de Bruijn, F. Geissmann, H.-R. Rodewald, Tissue-resident macrophages originate  
552 from yolk-sac-derived erythro-myeloid progenitors. *Nature*. **518**, 547–551 (2015).
- 553 4. X. Fan, A. Y. Rudensky, Hallmarks of Tissue-Resident Lymphocytes. *Cell*. **164**, 1198–1211 (2016).
- 554 5. J. M. Schenkel, D. Masopust, Identification of a resident T-cell memory core transcriptional  
555 signature. *Immunology & Cell Biology*. **92** (2014), pp. 8–9.
- 556 6. D. L. Woodland, J. E. Kohlmeier, Migration, maintenance and recall of memory T cells in  
557 peripheral tissues. *Nat. Rev. Immunol.* **9**, 153–161 (2009).
- 558 7. D. J. Topham, E. C. Reilly, Tissue-Resident Memory CD8+ T Cells: From Phenotype to Function.  
559 *Front. Immunol.* **9**, 515 (2018).
- 560 8. M. T. Wong, D. E. H. Ong, F. S. H. Lim, K. W. W. Teng, N. McGovern, S. Narayanan, W. Q. Ho, D.  
561 Cerny, H. K. K. Tan, R. Anicete, B. K. Tan, T. K. H. Lim, C. Y. Chan, P. C. Cheow, S. Y. Lee, A.  
562 Takano, E.-H. Tan, J. K. C. Tam, E. Y. Tan, J. K. Y. Chan, K. Fink, A. Bertolotti, F. Ginhoux, M. A.  
563 Curotto de Lafaille, E. W. Newell, A High-Dimensional Atlas of Human T Cell Diversity Reveals  
564 Tissue-Specific Trafficking and Cytokine Signatures. *Immunity*. **45**, 442–456 (2016).
- 565 9. P. Dogra, C. Rancan, W. Ma, M. Toth, T. Senda, D. J. Carpenter, M. Kubota, R. Matsumoto, P.  
566 Thapa, P. A. Szabo, M. M. Li Poon, J. Li, J. Arakawa-Hoyt, Y. Shen, L. Fong, L. L. Lanier, D. L.  
567 Farber, Tissue Determinants of Human NK Cell Development, Function, and Residence. *Cell*.  
568 **180**, 749–763.e13 (2020).
- 569 10. N. A. Yudanin, F. Schmitz, A.-L. Flamar, J. J. C. Thome, E. Tait Wojno, J. B. Moeller, M. Schirmer,  
570 I. J. Latorre, R. J. Xavier, D. L. Farber, L. A. Monticelli, D. Artis, Spatial and Temporal Mapping of  
571 Human Innate Lymphoid Cells Reveals Elements of Tissue Specificity. *Immunity*. **50**, 505–519.e4  
572 (2019).
- 573 11. B. V. Kumar, T. J. Connors, D. L. Farber, Human T Cell Development, Localization, and Function  
574 throughout Life. *Immunity*. **48**, 202–213 (2018).
- 575 12. N. Aizarani, A. Saviano, Sagar, L. Mailly, S. Durand, J. S. Herman, P. Pessaux, T. F. Baumert, D.  
576 Grün, A human liver cell atlas reveals heterogeneity and epithelial progenitors. *Nature*. **572**,  
577 199–204 (2019).
- 578 13. J. Zhao, S. Zhang, Y. Liu, X. He, M. Qu, G. Xu, H. Wang, M. Huang, J. Pan, Z. Liu, Z. Li, L. Liu, Z.  
579 Zhang, Single-cell RNA sequencing reveals the heterogeneity of liver-resident immune cells in  
580 human. *Cell Discov.* **6**, 22 (2020).
- 581 14. J.-E. Park, R. A. Botting, C. Domínguez Conde, D.-M. Popescu, M. Lavaert, D. J. Kunz, I. Goh, E.  
582 Stephenson, R. Ragazzini, E. Tuck, A. Wilbrey-Clark, K. Roberts, V. R. Kedlian, J. R. Ferdinand,  
583 X. He, S. Webb, D. Maunder, N. Vandamme, K. T. Mahbubani, K. Polanski, L. Mamanova, L. Bolt,  
584 D. Crossland, F. de Rita, A. Fuller, A. Filby, G. Reynolds, D. Dixon, K. Saeb-Parsy, S. Lisgo, D.



- 585 Henderson, R. Vento-Tormo, O. A. Bayraktar, R. A. Barker, K. B. Meyer, Y. Saeys, P. Bonfanti, S.  
586 Behjati, M. R. Clatworthy, T. Taghon, M. Haniffa, S. A. Teichmann, A cell atlas of human thymic  
587 development defines T cell repertoire formation. *Science*. **367** (2020),  
588 doi:10.1126/science.aay3224.
- 589 15. K. R. James, T. Gomes, R. Elmentaite, N. Kumar, E. L. Gulliver, H. W. King, M. D. Stares, B. R.  
590 Bareham, J. R. Ferdinand, V. N. Petrova, K. Polański, S. C. Forster, L. B. Jarvis, O. Suchanek, S.  
591 Howlett, L. K. James, J. L. Jones, K. B. Meyer, M. R. Clatworthy, K. Saeb-Parsy, T. D. Lawley, S.  
592 A. Teichmann, Distinct microbial and immune niches of the human colon. *Nat. Immunol.* **21**,  
593 343–353 (2020).
- 594 16. M. D. Young, T. J. Mitchell, F. A. Vieira Braga, M. G. B. Tran, B. J. Stewart, J. R. Ferdinand, G.  
595 Collord, R. A. Botting, D.-M. Popescu, K. W. Loudon, R. Vento-Tormo, E. Stephenson, A. Cagan,  
596 S. J. Farndon, M. Del Castillo Velasco-Herrera, C. Guzzo, N. Richoz, L. Mamanova, T. Aho, J. N.  
597 Armitage, A. C. P. Riddick, I. Mushtaq, S. Farrell, D. Rampling, J. Nicholson, A. Filby, J. Burge, S.  
598 Lisgo, P. H. Maxwell, S. Lindsay, A. Y. Warren, G. D. Stewart, N. Sebire, N. Coleman, M. Haniffa,  
599 S. A. Teichmann, M. Clatworthy, S. Behjati, Single-cell transcriptomes from human kidneys reveal  
600 the cellular identity of renal tumors. *Science*. **361**, 594–599 (2018).
- 601 17. P. A. Szabo, H. M. Levitin, M. Miron, M. E. Snyder, T. Senda, J. Yuan, Y. L. Cheng, E. C. Bush, P.  
602 Dogra, P. Thapa, D. L. Farber, P. A. Sims, Single-cell transcriptomics of human T cells reveals  
603 tissue and activation signatures in health and disease. *Nat. Commun.* **10**, 4706 (2019).
- 604 18. Tabula Muris Consortium, Overall coordination, Logistical coordination, Organ collection and  
605 processing, Library preparation and sequencing, Computational data analysis, Cell type  
606 annotation, Writing group, Supplemental text writing group, Principal investigators, Single-cell  
607 transcriptomics of 20 mouse organs creates a Tabula Muris. *Nature*. **562**, 367–372 (2018).
- 608 19. S. He, L.-H. Wang, Y. Liu, Y.-Q. Li, H.-T. Chen, J.-H. Xu, W. Peng, G.-W. Lin, P.-P. Wei, B. Li, X.  
609 Xia, D. Wang, J.-X. Bei, X. He, Z. Guo, Single-cell transcriptome profiling of an adult human cell  
610 atlas of 15 major organs, , doi:10.1101/2020.03.18.996975.
- 611 20. X. Han, Z. Zhou, L. Fei, H. Sun, R. Wang, Y. Chen, H. Chen, J. Wang, H. Tang, W. Ge, Y. Zhou, F.  
612 Ye, M. Jiang, J. Wu, Y. Xiao, X. Jia, T. Zhang, X. Ma, Q. Zhang, X. Bai, S. Lai, C. Yu, L. Zhu, R.  
613 Lin, Y. Gao, M. Wang, Y. Wu, J. Zhang, R. Zhan, S. Zhu, H. Hu, C. Wang, M. Chen, H. Huang, T.  
614 Liang, J. Chen, W. Wang, D. Zhang, G. Guo, Construction of a human cell landscape at  
615 single-cell level. *Nature*. **581**, 303–309 (2020).
- 616 21. C. C. Brown, H. Gudjonson, Y. Pritykin, D. Deep, V.-P. Lavallée, A. Mendoza, R. Fromme, L.  
617 Mazutis, C. Ariyan, C. Leslie, D. Pe'er, A. Y. Rudensky, Transcriptional Basis of Mouse and  
618 Human Dendritic Cell Heterogeneity. *Cell*. **179**, 846–863.e24 (2019).
- 619 22. A.-C. Villani, R. Satija, G. Reynolds, S. Sarkizova, K. Shekhar, J. Fletcher, M. Griesbeck, A.  
620 Butler, S. Zheng, S. Lazo, L. Jardine, D. Dixon, E. Stephenson, E. Nilsson, I. Grundberg, D.  
621 McDonald, A. Filby, W. Li, P. L. De Jager, O. Rozenblatt-Rosen, A. A. Lane, M. Haniffa, A. Regev,  
622 N. Hacohen, Single-cell RNA-seq reveals new types of human blood dendritic cells, monocytes,  
623 and progenitors. *Science*. **356** (2017), doi:10.1126/science.aah4573.
- 624 23. M. Haldar, M. Kohyama, A. Y.-L. So, W. Kc, X. Wu, C. G. Briseño, A. T. Satpathy, N. M. Kretzer,  
625 H. Arase, N. S. Rajasekaran, L. Wang, T. Egawa, K. Igarashi, D. Baltimore, T. L. Murphy, K. M.  
626 Murphy, Heme-mediated SPI-C induction promotes monocyte differentiation into iron-recycling  
627 macrophages. *Cell*. **156**, 1223–1234 (2014).
- 628 24. M. Di Rosa, G. Malaguarnera, C. De Gregorio, F. D'Amico, M. C. Mazzarino, L. Malaguarnera,  
629 Modulation of chitotriosidase during macrophage differentiation. *Cell Biochem. Biophys.* **66**,  
630 239–247 (2013).
- 631 25. M. A. Seibold, S. Donnelly, M. Solon, A. Innes, P. G. Woodruff, R. G. Boot, E. G. Burchard, J. V.  
632 Fahy, Chitotriosidase is the primary active chitinase in the human lung and is modulated by



- 633 genotype and smoking habit. *J. Allergy Clin. Immunol.* **122**, 944–950.e3 (2008).
- 634 26. S. J. Van Dyken, H.-E. Liang, R. P. Naikawadi, P. G. Woodruff, P. J. Wolters, D. J. Erle, R. M.  
635 Locksley, Spontaneous Chitin Accumulation in Airways and Age-Related Fibrotic Lung Disease.  
636 *Cell.* **169**, 497–509.e13 (2017).
- 637 27. K. J. Travaglini, A. N. Nabhan, L. Penland, R. Sinha, A. Gillich, R. V. Sit, S. Chang, S. D. Conley,  
638 Y. Mori, J. Seita, G. J. Berry, J. B. Shrager, R. J. Metzger, C. S. Kuo, N. Neff, I. L. Weissman, S.  
639 R. Quake, M. A. Krasnow, A molecular cell atlas of the human lung from single-cell RNA  
640 sequencing. *Nature.* **587**, 619–625 (2020).
- 641 28. B. N. Lambrecht, H. Hammad, Biology of lung dendritic cells at the origin of asthma. *Immunity.* **31**,  
642 412–424 (2009).
- 643 29. M.-L. Golinski, M. Demeules, C. Derambure, G. Riou, M. Maho-Vaillant, O. Boyer, P. Joly, S.  
644 Calbo, CD11c+ B Cells Are Mainly Memory Cells, Precursors of Antibody Secreting Cells in  
645 Healthy Donors. *Front. Immunol.* **11**, 32 (2020).
- 646 30. K. Kitaura, H. Yamashita, H. Ayabe, T. Shini, T. Matsutani, R. Suzuki, Different Somatic  
647 Hypermutation Levels among Antibody Subclasses Disclosed by a New Next-Generation  
648 Sequencing-Based Antibody Repertoire Analysis. *Front. Immunol.* **8**, 389 (2017).
- 649 31. W. Meng, B. Zhang, G. W. Schwartz, A. M. Rosenfeld, D. Ren, J. J. C. Thome, D. J. Carpenter, N.  
650 Matsuoka, H. Lerner, A. L. Friedman, T. Granot, D. L. Farber, M. J. Shlomchik, U. Hershberg, E. T.  
651 Luning Prak, An atlas of B-cell clonal distribution in the human body. *Nat. Biotechnol.* **35**, 879–884  
652 (2017).
- 653 32. E. Hammarlund, A. Thomas, I. J. Amanna, L. A. Holden, O. D. Slayden, B. Park, L. Gao, M. K.  
654 Slifka, Plasma cell survival in the absence of B cell memory. *Nat. Commun.* **8**, 1781 (2017).
- 655 33. N. J. Schuldt, B. A. Binstadt, Dual TCR T Cells: Identity Crisis or Multitaskers? *J. Immunol.* **202**,  
656 637–644 (2019).
- 657 34. M. Van der Vieren, D. T. Crowe, D. Hoekstra, R. Vazeux, P. A. Hoffman, M. H. Grayson, B. S.  
658 Bochner, W. Michael Gallatin, D. E. Staunton, The Leukocyte Integrin  $\alpha$ D $\beta$ 2 Binds VCAM-1:  
659 Evidence for a Binding Interface Between I Domain and VCAM-1. *The Journal of Immunology.*  
660 **163**, 1984–1990 (1999).
- 661 35. E. Mass, I. Ballesteros, M. Farlik, F. Halbritter, P. Günther, L. Crozet, C. E. Jacome-Galarza, K.  
662 Händler, J. Klughammer, Y. Kobayashi, E. Gomez-Perdiguero, J. L. Schultze, M. Beyer, C. Bock,  
663 F. Geissmann, Specification of tissue-resident macrophages during organogenesis. *Science.* **353**  
664 (2016), doi:10.1126/science.aaf4238.
- 665 36. Z. Bian, Y. Gong, T. Huang, C. Z. W. Lee, L. Bian, Z. Bai, H. Shi, Y. Zeng, C. Liu, J. He, J. Zhou,  
666 X. Li, Z. Li, Y. Ni, C. Ma, L. Cui, R. Zhang, J. K. Y. Chan, L. G. Ng, Y. Lan, F. Ginhoux, B. Liu,  
667 Deciphering human macrophage development at single-cell resolution. *Nature.* **582**, 571–576  
668 (2020).
- 669 37. J. R. Fergusson, M. D. Morgan, M. Bruchard, L. Huitema, B. A. Heesters, V. van Unen, J. P. van  
670 Hamburg, N. N. van der Wel, D. Picavet, F. Koning, S. W. Tas, M. S. Anderson, J. C. Marioni, G.  
671 A. Holländer, H. Spits, Maturing Human CD127+ CCR7+ PDL1+ Dendritic Cells Express AIRE in  
672 the Absence of Tissue Restricted Antigens. *Front. Immunol.* **9**, 2902 (2018).
- 673 38. T. Ito, Y.-H. Wang, O. Duramad, T. Hori, G. J. Delespesse, N. Watanabe, F. X.-F. Qin, Z. Yao, W.  
674 Cao, Y.-J. Liu, TSLP-activated dendritic cells induce an inflammatory T helper type 2 cell  
675 response through OX40 ligand. *J. Exp. Med.* **202**, 1213–1223 (2005).
- 676 39. V. Soumelis, P. A. Reche, H. Kanzler, W. Yuan, G. Edward, B. Homey, M. Gilliet, S. Ho, S.  
677 Antonenko, A. Lauerma, K. Smith, D. Gorman, S. Zurawski, J. Abrams, S. Menon, T.  
678 McClanahan, R. de Waal-Malefyt Rd, F. Bazan, R. A. Kastelein, Y.-J. Liu, Human epithelial cells

- 679 trigger dendritic cell mediated allergic inflammation by producing TSLP. *Nat. Immunol.* **3**, 673–680  
680 (2002).
- 681 40. H. J. Sutton, R. Aye, A. H. Idris, R. Vistein, E. Nduati, O. Kai, J. Mwacharo, X. Li, X. Gao, T. D.  
682 Andrews, M. Koutsakos, T. H. O. Nguyen, M. Nekrasov, P. Milburn, A. Eltahla, A. A. Berry, N. Kc,  
683 S. Chakravarty, B. K. L. Sim, A. K. Wheatley, S. J. Kent, S. L. Hoffman, K. E. Lyke, P. Bejon, F.  
684 Luciani, K. Kedzierska, R. A. Seder, F. M. Ndungu, I. A. Cockburn, Atypical B cells are part of an  
685 alternative lineage of B cells that participates in responses to vaccination and infection in humans.  
686 *Cell Rep.* **34**, 108684 (2021).
- 687 41. D. Nehar-Belaid, S. Hong, R. Marches, G. Chen, M. Bolisetty, J. Baisch, L. Walters, M. Punaro, R.  
688 J. Rossi, C.-H. Chung, R. P. Huynh, P. Singh, W. F. Flynn, J.-A. Tabanor-Gayle, N. Kuchipudi, A.  
689 Mejias, M. A. Collet, A. L. Lucido, K. Palucka, P. Robson, S. Lakshminarayanan, O. Ramilo, T.  
690 Wright, V. Pascual, J. F. Banchereau, Mapping systemic lupus erythematosus heterogeneity at  
691 the single-cell level. *Nat. Immunol.* **21**, 1094–1106 (2020).
- 692 42. A. Bonner, A. Almogren, P. B. Furtado, M. A. Kerr, S. J. Perkins, The nonplanar secretory IgA2  
693 and near planar secretory IgA1 solution structures rationalize their different mucosal immune  
694 responses. *J. Biol. Chem.* **284**, 5077–5087 (2009).
- 695 43. M. Kilian, J. Reinholdt, H. Lomholt, K. Poulsen, E. V. Frandsen, Biological significance of IgA1  
696 proteases in bacterial colonization and pathogenesis: critical evaluation of experimental evidence.  
697 *APMIS.* **104**, 321–338 (1996).
- 698 44. S. L. Wolock, R. Lopez, A. M. Klein, Scrublet: Computational Identification of Cell Doublets in  
699 Single-Cell Transcriptomic Data. *Cell Syst.* **8**, 281–291.e9 (2019).
- 700 45. B. Pijuan-Sala, J. A. Griffiths, C. Guibentif, T. W. Hiscock, W. Jawaid, F. J. Calero-Nieto, C. Mulas,  
701 X. Ibarra-Soria, R. C. V. Tyser, D. L. L. Ho, W. Reik, S. Srinivas, B. D. Simons, J. Nichols, J. C.  
702 Marioni, B. Göttgens, A single-cell molecular map of mouse gastrulation and early organogenesis.  
703 *Nature.* **566**, 490–495 (2019).
- 704 46. G. Sturm, T. Szabo, G. Fotakis, M. Haider, D. Rieder, Z. Trajanoski, F. Finotello, Scirpy: a Scanpy  
705 extension for analyzing single-cell T-cell receptor-sequencing data. *Bioinformatics.* **36**, 4817–4818  
706 (2020).
- 707 47. H. W. King, N. Orban, J. C. Riches, A. J. Clear, G. Warnes, S. A. Teichmann, L. K. James,  
708 Single-cell analysis of human B cell maturation predicts how antibody class switching shapes  
709 selection dynamics. *Sci Immunol.* **6** (2021), doi:10.1126/sciimmunol.abe6291.
- 710 48. J. A. V. Heiden, J. A. Vander Heiden, G. Yaari, M. Uduman, J. N. H. Stern, K. C. O'Connor, D. A.  
711 Hafler, F. Vigneault, S. H. Kleinstein, pRESTO: a toolkit for processing high-throughput  
712 sequencing raw reads of lymphocyte receptor repertoires. *Bioinformatics.* **30** (2014), pp.  
713 1930–1932.
- 714 49. J. Ye, N. Ma, T. L. Madden, J. M. Ostell, IgBLAST: an immunoglobulin variable domain sequence  
715 analysis tool. *Nucleic Acids Res.* **41**, W34–40 (2013).
- 716 50. D. Gadala-Maria, G. Yaari, M. Uduman, S. H. Kleinstein, Automated analysis of high-throughput  
717 B-cell sequencing data reveals a high frequency of novel immunoglobulin V gene segment alleles.  
718 *Proc. Natl. Acad. Sci. U. S. A.* **112**, E862–70 (2015).
- 719 51. N. T. Gupta, J. A. Vander Heiden, M. Uduman, D. Gadala-Maria, G. Yaari, S. H. Kleinstein,  
720 Change-O: a toolkit for analyzing large-scale B cell immunoglobulin repertoire sequencing data.  
721 *Bioinformatics.* **31**, 3356–3358 (2015).
